# Supplementary material for: Synthesis of ethylene copolymers with 2-allylphenol by using half-titanocene catalysts containing SiEt3-, SiiPr3-substituted phenoxide ligands, Cp*TiCl2(O-2,6-iPr2-4-SiR3-C6H2) (R = Et, iPr)
Source: Royal Society of Chemistry journal article supplement (doi:10.1039/d4cy00578c), 2024-01-01
Supplement: d4cy00578c1.pdf [file d4cy00578c1.pdf]

Electronic Supplementary Information (ESI)

Synthesis of Ethylene Copolymers with 2-Allylphenol by Half-Titanocene  
Catalysts Containing SiEt<sub>3</sub>-, Si<sup>i</sup>Pr<sub>3</sub>-Substituted Phenoxide ligands, Cp\*TiCl<sub>2</sub>(O-  
2,6-<sup>i</sup>Pr<sub>2</sub>-4-SiR<sub>3</sub>-C<sub>6</sub>H<sub>2</sub>) (R = Et, <sup>i</sup>Pr)

Youshu Jiang, Daisuke Shimoyama, Jiahao Gao and Kotohiro Nomura\*

*<sup>a</sup>Department of Chemistry, Tokyo Metropolitan University, 1-1 Minami Osawa, Hachioji,  
Tokyo 192-0397, Japan*

\*Corresponding author, E-mail: ktnomura@tmu.ac.jp (KN).

**Table of Contents**

|    |                                                             |        |
|----|-------------------------------------------------------------|--------|
| 1. | Additional ethylene copolymerization with allylphenol (AP). | S2-3   |
| 2. | Selected NMR spectra in the copolymers.                     | S4-21  |
| 3. | Selected DSC thermograms in the copolymers.                 | S22-25 |

## 1. Additional results in ethylene copolymerization with 2-Allylphenol (AP)

**Table S1.** Ethylene Copolymerization with 2-Allylphenol (AP) by Cp\*TiCl<sub>2</sub>(O-2,6-*i*-Pr<sub>2</sub>-4-RC<sub>6</sub>H<sub>2</sub>) [R = H (**1**), SiEt<sub>3</sub> (**2**), Si(*i*-Pr)<sub>3</sub> (**3**)]-MAO catalyst systems (in toluene at 50 °C).<sup>a</sup>

| run             | cat.           | ethylene | AP <sup>b</sup> | TIBA <sup>c</sup> | yield <sup>d</sup> | activity <sup>e</sup> | $M_n^f$          | $M_w$    | $T_m/(T_g)^g$     | AP <sup>h</sup>     |
|-----------------|----------------|----------|-----------------|-------------------|--------------------|-----------------------|------------------|----------|-------------------|---------------------|
|                 | ( $\mu$ mol)   | / atm    | / M             | / equiv.          | / mg               |                       | $\times 10^{-4}$ | $/M_n^f$ | / °C              | / mol%              |
| 1 <sup>i</sup>  | <b>1</b> (5.0) | 2        | 0.25            | 1.1               | 88.5               | 110                   | 2.42             | 2.38     | 110.6             | 4.1                 |
| S1 <sup>i</sup> | <b>1</b> (5.0) | 2        | 0.25            | 1.1               | 85.4               | 100                   | 3.16             | 2.08     | 111.6             |                     |
| 2 <sup>i</sup>  | <b>1</b> (5.0) | 2        | 0.51            | 1.1               | 34.5               | 40                    | 1.07             | 1.73     | 95.3, 129.7       | (7.8) <sup>k</sup>  |
| S2 <sup>j</sup> | <b>1</b> (5.0) | 2        | 0.51            | 1.1               | 71.3               | 90                    | 11.7             | 1.55     | 98.5,131.4        |                     |
| 3 <sup>i</sup>  | <b>1</b> (5.0) | 2        | 0.76            | 1.1               | 28.5               | 30                    | 0.71             | 2.47     | 83.8,130.2(2.6)   | (10.5) <sup>k</sup> |
| 4               | <b>1</b> (0.5) | 4        | 0.25            | 1.1               | 169.2              | 2030                  | 3.82             | 2.03     | 125.5             | 0.9                 |
| S3              | <b>1</b> (0.5) | 4        | 0.25            | 1.1               | 165.8              | 1990                  | 3.60             | 2.15     | 125.7             |                     |
| 8               | <b>2</b> (0.5) | 4        | 0.25            | 1.2               | 183.5              | 2200                  | 6.23             | 2.24     | 122.3             | 1.2                 |
| S4              | <b>2</b> (0.5) | 4        | 0.25            | 1.2               | 211.3              | 2540                  | 6.19             | 2.53     | 122.4             |                     |
| S5 <sup>i</sup> | <b>2</b> (0.5) | 4        | 0.38            | 1.2               | 147.5              | 1770                  | 8.38             | 1.94     | 121.8             |                     |
| 10              | <b>2</b> (0.5) | 4        | 0.76            | 1.2               | 107.2              | 1290                  | 3.86             | 1.87     | 108.1,123.1,126.5 | (4.1) <sup>k</sup>  |
| 11              | <b>2</b> (0.5) | 6        | 0.25            | 1.0               | 156.3              | 1880                  | 11.3             | 2.23     | 121.5             | 1.6                 |
| S6              | <b>2</b> (2.0) | 4        | 0.25            | 1.2               | 373.1              | 1120                  | 6.00             | 2.56     | 119.1             |                     |
| 12              | <b>2</b> (1.0) | 6        | 0.25            | 1.0               | 323.9              | 1940                  | 9.19             | 2.30     | 121.7             | 1.5                 |
| S7              | <b>2</b> (1.0) | 6        | 0.25            | 1.0               | 319.0              | 1910                  | 6.03             | 2.02     |                   |                     |
| 13              | <b>2</b> (1.0) | 6        | 0.25            | 1.2               | 306.4              | 1840                  | 6.81             | 2.21     | 121.6             | 1.7                 |
| S8              | <b>2</b> (1.0) | 6        | 0.25            | 1.2               | 311.8              | 1870                  | 4.87             | 2.05     |                   |                     |
| 17 <sup>i</sup> | <b>3</b> (1.0) | 6        | 0.38            | 1.2               | 395.1              | 2370                  | 4.57             | 1.86     | 123.6             | 1.0                 |
| 18 <sup>i</sup> | <b>3</b> (1.0) | 6        | 0.51            | 1.2               | 344.5              | 2070                  | 3.8              | 1.91     | 122.5             | 1.2                 |

<sup>a</sup>Conditions: Toluene and 2-allylphenol (AP) total 30.0 mL, d-MAO 3.0 mmol, 50 °C, 10 min.

<sup>b</sup>Initial AP concentration in mmol/mL (M). <sup>c</sup>Molar ratio of TIBA/AP, TIBA = Al(*i*-Bu)<sub>3</sub>.

<sup>d</sup>Isolated yield. <sup>e</sup>Activity in kg-polymer/mol-Ti·h. <sup>f</sup>GPC data (g/mol) in *o*-dichlorobenzene vs

polystyrene standards. <sup>g</sup>By DSC thermograms. <sup>h</sup>Estimated by <sup>1</sup>H NMR spectra in C<sub>2</sub>D<sub>2</sub>Cl<sub>4</sub> at

110 °C. <sup>i</sup>MAO 4.0 mmol. <sup>j</sup>MAO 10.0 mmol. <sup>k</sup>Estimated AP content as whole polymer.

**Table S2.** Ethylene Copolymerization with 2-Allylphenol (AP) by Cp\*TiCl<sub>2</sub>(O-2,6-*i*-Pr<sub>2</sub>-4-RC<sub>6</sub>H<sub>2</sub>) [R = H (**1**), SiEt<sub>3</sub> (**2**), Si(*i*-Pr)<sub>3</sub> (**3**)], 1,2,4-Me<sub>3</sub>CpTiCl<sub>2</sub>(O-2,6-*i*-Pr<sub>2</sub>-4-C<sub>6</sub>H<sub>3</sub>) (**4**), <sup>t</sup>BuCpTiCl<sub>2</sub>(O-2,6-*i*-Pr<sub>2</sub>-4-C<sub>6</sub>H<sub>3</sub>) (**5**)–MAO catalyst systems (in toluene at 50 °C).<sup>a</sup>

| run              | cat.           | ethylene | AP <sup>b</sup> | yield <sup>c</sup> | activity <sup>d</sup> | M <sub>n</sub> <sup>e</sup> | M <sub>w</sub>               | T <sub>m</sub> /(T <sub>g</sub> ) <sup>f</sup> | AP <sup>g</sup> |
|------------------|----------------|----------|-----------------|--------------------|-----------------------|-----------------------------|------------------------------|------------------------------------------------|-----------------|
|                  | (μmol)         | / atm    | / M             | / mg               |                       | ×10 <sup>-4</sup>           | /M <sub>n</sub> <sup>e</sup> | / °C                                           | / mol%          |
| 31               | <b>1</b> (5.0) | 2        | 0.25            | 222.7              | 270                   | 1.98                        | 1.71                         | 106.6                                          | 4.7             |
| S9               | <b>1</b> (5.0) | 2        | 0.25            | 223.5              | 270                   | 3.51                        | 1.72                         | 107.0                                          |                 |
| 32               | <b>1</b> (5.0) | 2        | 0.51            | 89.2               | 110                   | 1.49                        | 1.66                         | 102.9                                          | 6.0             |
| 33 <sup>h</sup>  | <b>1</b> (5.0) | 2        | 0.51            | 120.9              | 150                   | 1.29                        | 1.60                         | 102.1                                          | 6.2             |
| 35 <sup>h</sup>  | <b>2</b> (5.0) | 2        | 0.25            | 202.2              | 240                   | 1.43                        | 1.57                         | 110.8                                          | 4.1             |
| S10 <sup>h</sup> | <b>2</b> (5.0) | 2        | 0.25            | 196.8              | 240                   | 2.82                        | 1.76                         | 106.7                                          |                 |
| 36               | <b>2</b> (5.0) | 2        | 0.51            | 74.4               | 90                    | 3.25                        | 1.65                         | 99.0(5.4)                                      | 7.2             |
| 37 <sup>h</sup>  | <b>2</b> (5.0) | 2        | 0.51            | 117.2              | 140                   | 0.95                        | 2.19                         | 92.8(2.6)                                      | 8.0             |
| 22               | <b>2</b> (0.5) | 4        | 0.25            | 272.5              | 3270                  | 17.0                        | 2.05                         | 119.6                                          | 1.9             |
| S11              | <b>2</b> (0.5) | 4        | 0.25            | 265.1              | 3180                  | 14.7                        | 1.86                         |                                                |                 |
| 23               | <b>2</b> (0.5) | 4        | 0.51            | 125.3              | 1500                  | 9.68                        | 1.84                         |                                                |                 |
| 24               | <b>2</b> (0.5) | 4        | 0.76            | 41.0               | 480                   | 4.42                        | 1.86                         | 114.5                                          | 3.0             |
| 39               | <b>3</b> (5.0) | 2        | 0.25            | 248.8              | 300                   | 4.32                        | 1.81                         | 108.3                                          | 4.2             |
| S12              | <b>3</b> (5.0) | 2        | 0.25            | 217.5              | 260                   | 1.68                        | 1.65                         | 107.4                                          |                 |
| 40               | <b>3</b> (5.0) | 2        | 0.51            | 77.2               | 90                    | 1.12                        | 1.73                         | 102.9                                          | 6.0             |
| S13              | <b>3</b> (5.0) | 2        | 0.51            | 71.1               | 90                    | 0.73                        | 1.86                         |                                                |                 |
| 41 <sup>h</sup>  | <b>3</b> (5.0) | 2        | 0.51            | 89.2               | 110                   | 0.95                        | 1.58                         | 95.9(4.0)                                      | 8.2             |
| 42 <sup>h</sup>  | <b>3</b> (5.0) | 2        | 0.76            | 77.9               | 90                    | 1.06                        | 1.57                         | 91.8(2.5)                                      | 9.0             |
| 25               | <b>3</b> (1.0) | 4        | 0.25            | 225.9              | 1360                  | 7.01                        | 1.71                         | 117.9                                          | 2.2             |
| S14              | <b>3</b> (1.0) | 4        | 0.25            | 250.8              | 1540                  | 5.22                        | 2.00                         | 118.2                                          |                 |
| 26               | <b>3</b> (1.0) | 4        | 0.51            | 201.0              | 1200                  | 6.10                        | 2.01                         | 117.0                                          | 2.4             |
| S15              | <b>3</b> (1.0) | 4        | 0.51            | 183.9              | 1130                  | 6.64                        | 1.93                         |                                                |                 |
| 27               | <b>3</b> (1.0) | 4        | 0.76            | 55.8               | 330                   | 2.91                        | 1.95                         | 111.0                                          | 3.8             |
| S16              | <b>3</b> (1.0) | 4        | 0.76            | 52.4               | 320                   | 2.98                        | 1.85                         | 115.2                                          |                 |
| 29               | <b>4</b> (5.0) | 2        | 0.25            | 54.9               | 70                    | 1.48                        | 2.03                         | 111.8                                          | 3.6             |
| S17              | <b>4</b> (5.0) | 2        | 0.25            | 55.2               | 70                    | 1.31                        | 1.73                         | 111.5                                          |                 |
| S18 <sup>h</sup> | <b>4</b> (5.0) | 2        | 0.25            | 77.3               | 90                    | 1.50                        | 1.37                         | 111.8                                          |                 |
| S19 <sup>h</sup> | <b>4</b> (5.0) | 2        | 0.51            | 42.3               | 50                    | 0.91                        | 1.70                         | 103.4                                          |                 |
| 28               | <b>4</b> (1.0) | 4        | 0.25            | 173.5              | 1050                  | 10.9                        | 2.97                         | 121.3                                          |                 |
| S20              | <b>4</b> (1.0) | 4        | 0.25            | 174.7              | 1050                  | 11.4                        | 2.95                         |                                                |                 |
| S21 <sup>h</sup> | <b>5</b> (5.0) | 2        | 0.25            | 54.2               | 70                    | 1.64                        | 1.45                         | 118.8                                          | 2.6             |
| 30               | <b>5</b> (1.0) | 4        | 0.25            | 84.0               | 510                   | 6.10                        | 2.19                         | 126.1                                          |                 |
| S22              | <b>5</b> (1.0) | 4        | 0.25            | 69.0               | 410                   | 7.28                        | 2.57                         |                                                |                 |

<sup>a</sup>Conditions: toluene and 2-allylphenol (AP) total 30.0 mL, d-MAO 4.0 mmol (10.0 mmol), 1.1 equiv of TIBA and 2,6-di-*tert*-butylphenol [based on mole ratio of -OH group (AP), TIBA = Al(*i*-Bu)<sub>3</sub>], 50 °C, 10 min. <sup>b</sup>Initial AP concentration in mmol/mL(M). <sup>c</sup>Isolated yield. <sup>d</sup>Activity in kg-polymer/mol-Ti·h. <sup>e</sup>GPC data (g/mol) in *o*-dichlorobenzene vs polystyrene standards. <sup>f</sup>By DSC thermograms. <sup>g</sup>Estimated by <sup>1</sup>H NMR spectra in C<sub>2</sub>D<sub>2</sub>Cl<sub>4</sub> at 110 °C. <sup>h</sup>MAO 10.0 mmol.

## 2. Selected NMR spectra in the copolymers

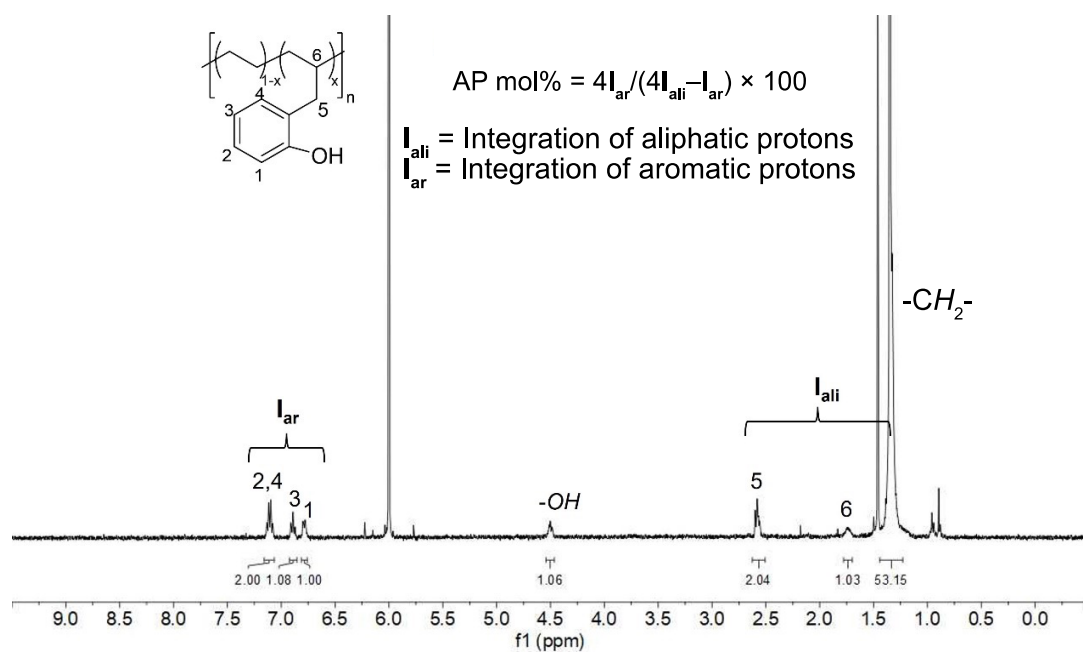

**Figure S1.** <sup>1</sup>H NMR spectrum (1,1,2,2-tetrachloroethane-*d*<sub>2</sub> at 110 °C) for poly(ethylene-*co*-AP) prepared by 1-MAO catalyst system at 50 °C, AP 0.51 M, ethylene 2 atm (Table 1, run 2, AP 7.8 mol%).

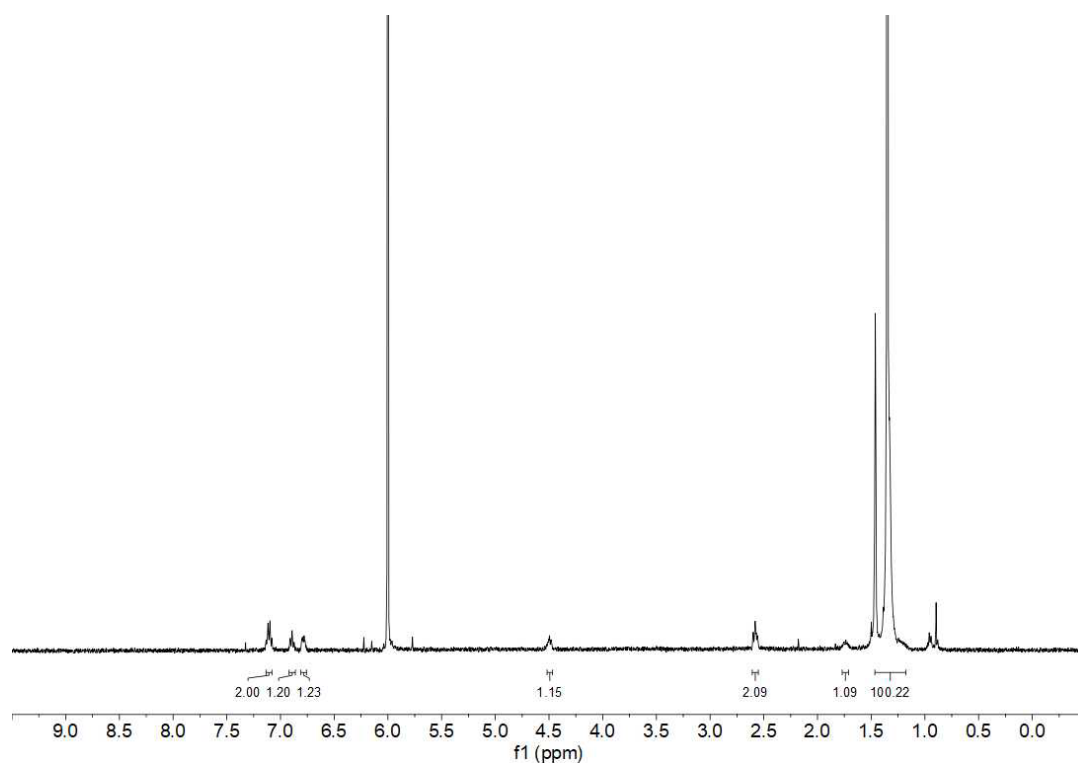

**Figure S2.** <sup>1</sup>H NMR spectrum (1,1,2,2-tetrachloroethane-*d*<sub>2</sub> at 110 °C) for poly(ethylene-*co*-AP) prepared by 1-MAO catalyst system at 50 °C, AP 0.25 M, ethylene 2 atm (Table 1, run 1, AP 4.1 mol%).

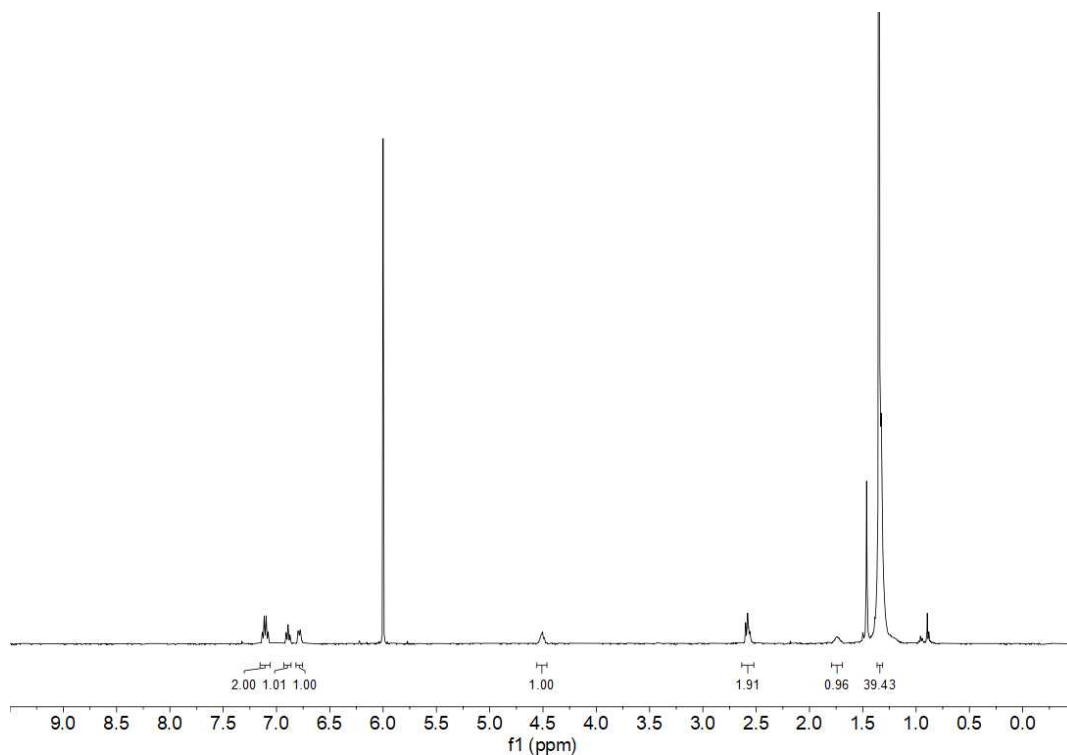

**Figure S3.**  $^1\text{H}$  NMR spectrum (1,1,2,2-tetrachloroethane- $d_2$  at 110  $^\circ\text{C}$ ) for poly(ethylene-*co*-AP) prepared by 1-MAO catalyst system at 50  $^\circ\text{C}$ , AP 0.76 M, ethylene 2 atm (Table 1, run 3, AP 10.5 mol%).

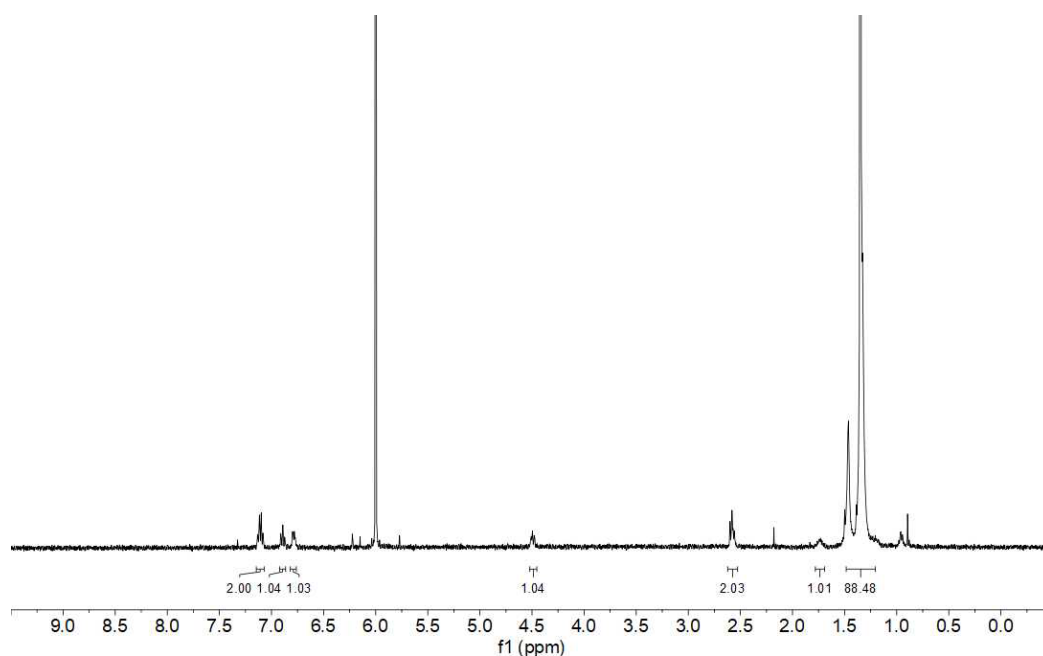

**Figure S4.**  $^1\text{H}$  NMR spectrum (1,1,2,2-tetrachloroethane- $d_2$  at 110  $^\circ\text{C}$ ) for poly(ethylene-*co*-AP) prepared by 2-MAO catalyst system at 50  $^\circ\text{C}$ , AP 0.25 M, ethylene 2 atm (Table 1, run 5, AP 4.5 mol%).

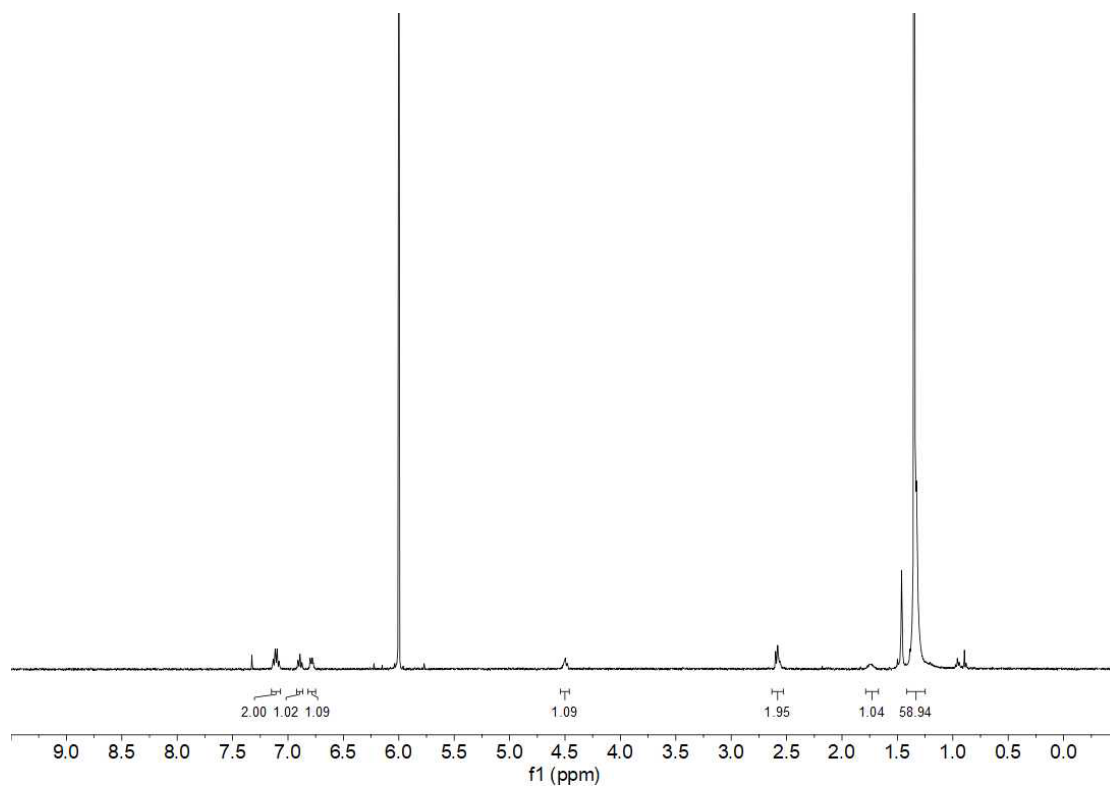

**Figure S5.** <sup>1</sup>H NMR spectrum (1,1,2,2-tetrachloroethane-*d*<sub>2</sub> at 110 °C) for poly(ethylene-*co*-AP) prepared by 2-MAO catalyst system at 50 °C, AP 0.51 M, ethylene 2 atm (Table 1, run 6, AP 7.1 mol%).

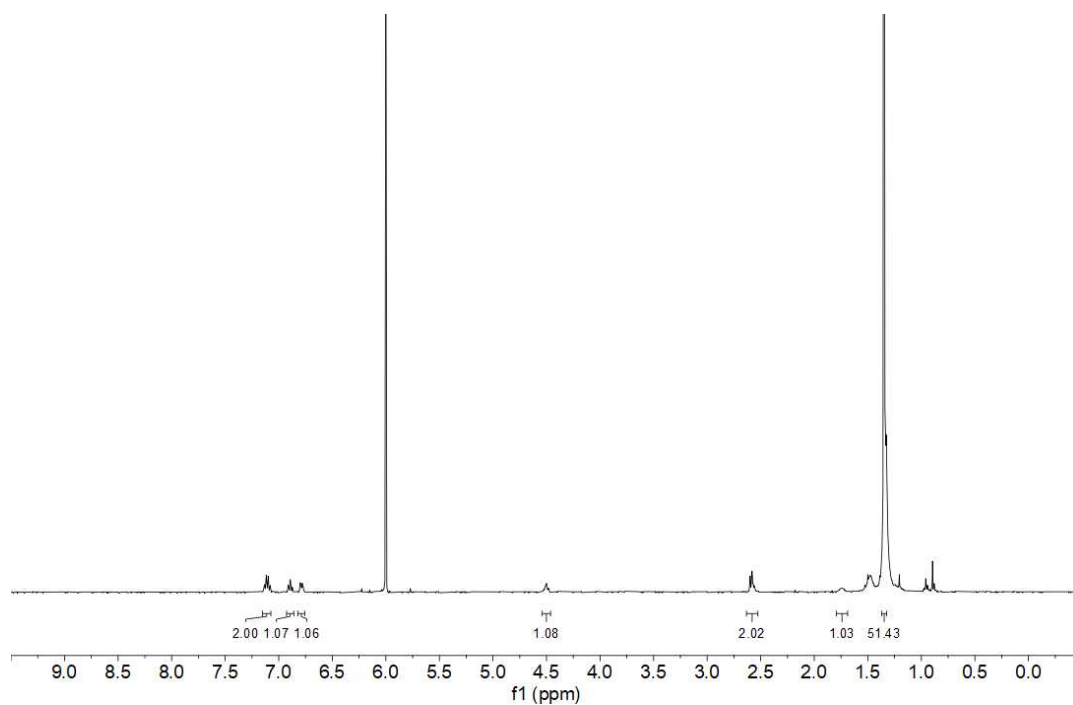

**Figure S6.** <sup>1</sup>H NMR spectrum (1,1,2,2-tetrachloroethane-*d*<sub>2</sub> at 110 °C) for poly(ethylene-*co*-AP) prepared by 2-MAO catalyst system at 50 °C, AP 0.76 M, ethylene 2 atm (Table 1, run 7, AP 8.2 mol%).

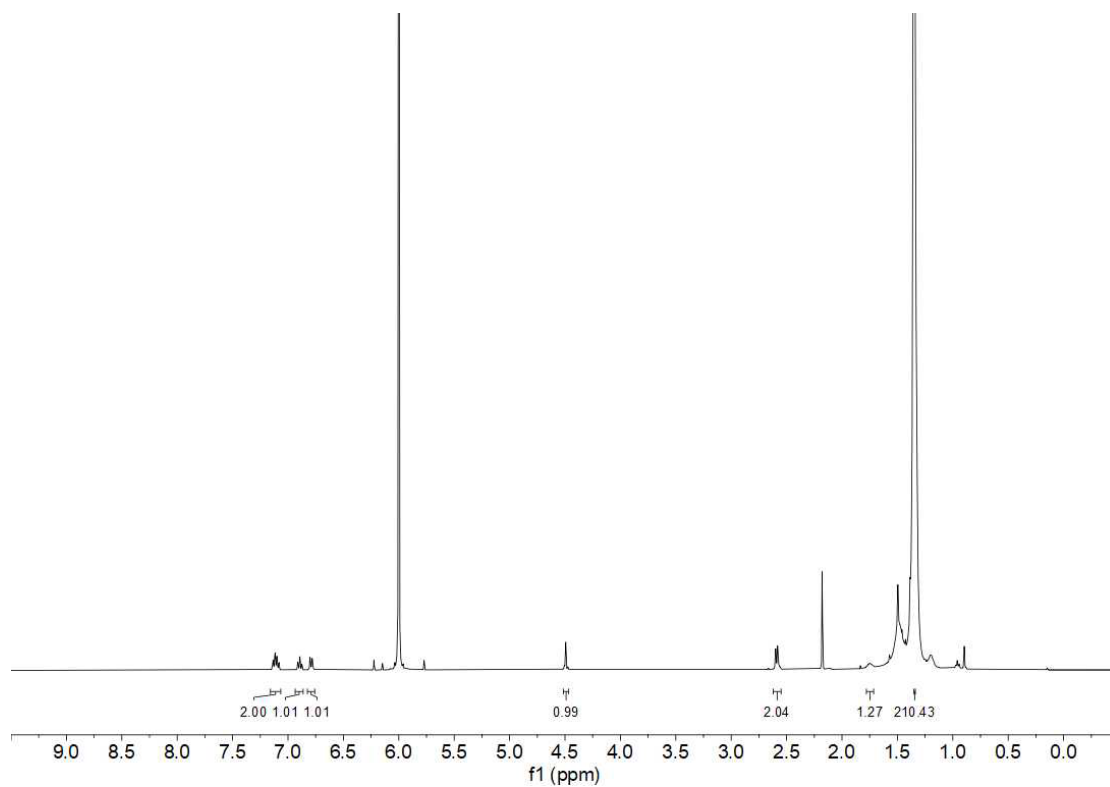

**Figure S7.** <sup>1</sup>H NMR spectrum (1,1,2,2-tetrachloroethane-*d*<sub>2</sub> at 110 °C) for poly(ethylene-*co*-AP) prepared by 2-MAO catalyst system at 50 °C, AP 0.51 M, ethylene 4 atm (Table 1, run 9, AP 1.9 mol%).

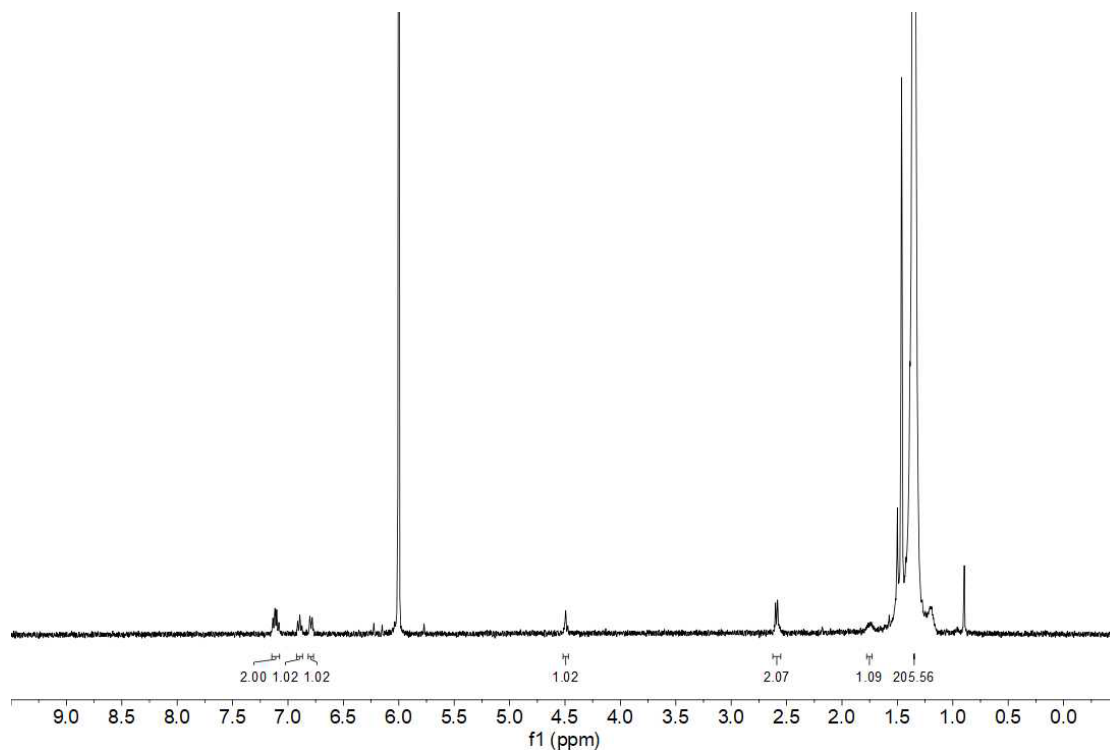

**Figure S8.** <sup>1</sup>H NMR spectrum (1,1,2,2-tetrachloroethane-*d*<sub>2</sub> at 110 °C) for poly(ethylene-*co*-AP) prepared by 2-MAO catalyst system at 50 °C, AP 0.25 M, ethylene 4 atm (Table 2, run 22, AP 1.9 mol%).

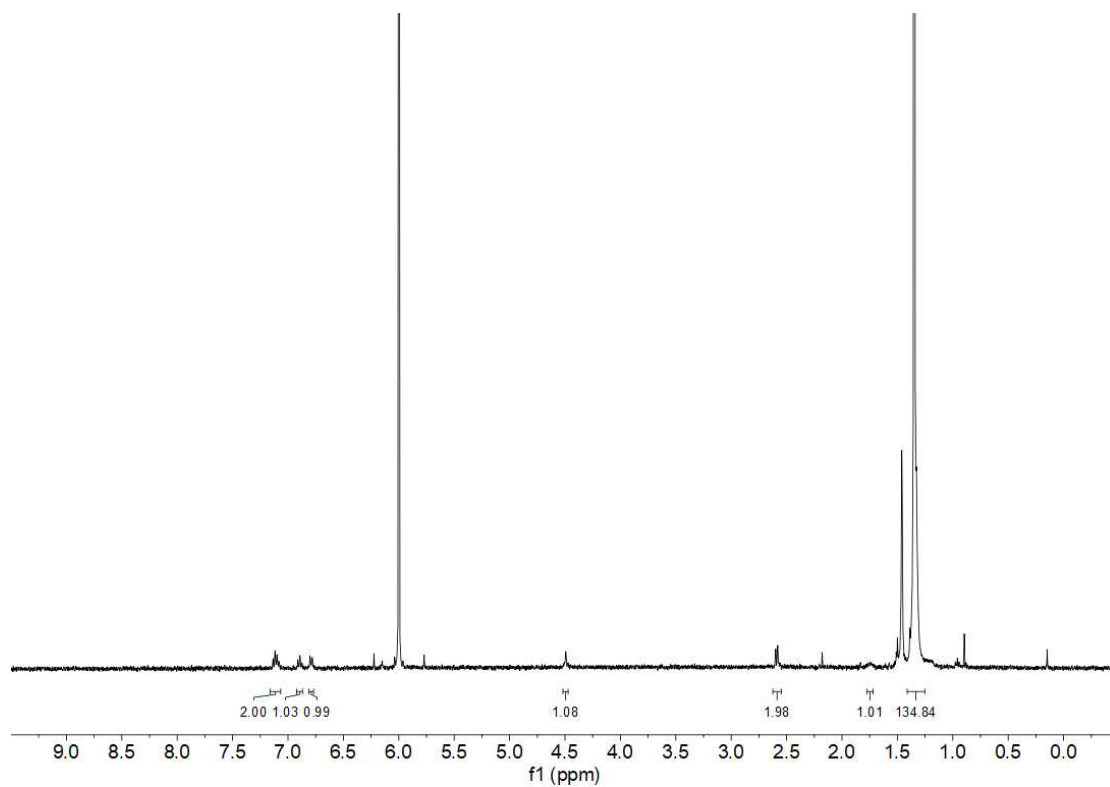

**Figure S9.**  $^1\text{H}$  NMR spectrum (1,1,2,2-tetrachloroethane- $d_2$  at 110  $^\circ\text{C}$ ) for poly(ethylene-*co*-AP) prepared by 2-MAO catalyst system at 50  $^\circ\text{C}$ , AP 0.76 M, ethylene 4 atm (Table 2, run 24, AP 3.0 mol%).

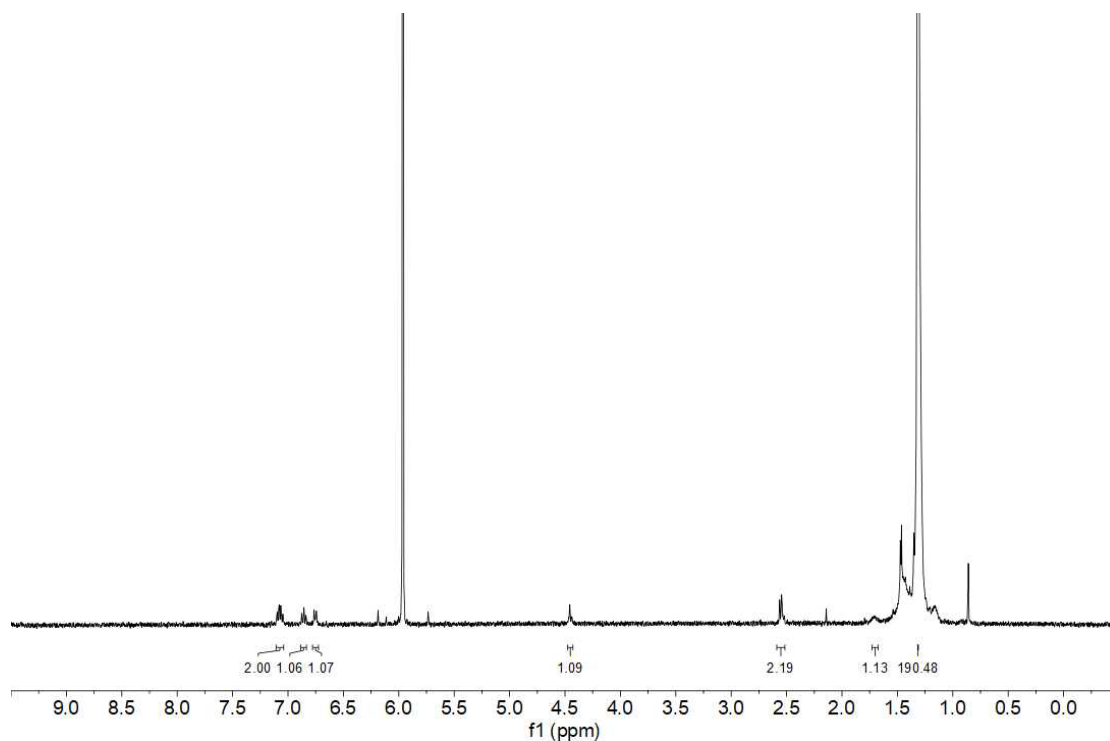

**Figure S10.**  $^1\text{H}$  NMR spectrum (1,1,2,2-tetrachloroethane- $d_2$  at 110  $^\circ\text{C}$ ) for poly(ethylene-*co*-AP) prepared by 3-MAO catalyst system at 50  $^\circ\text{C}$ , AP 0.76 M, ethylene 4 atm (Table 2, run 25, AP 2.2 mol%).



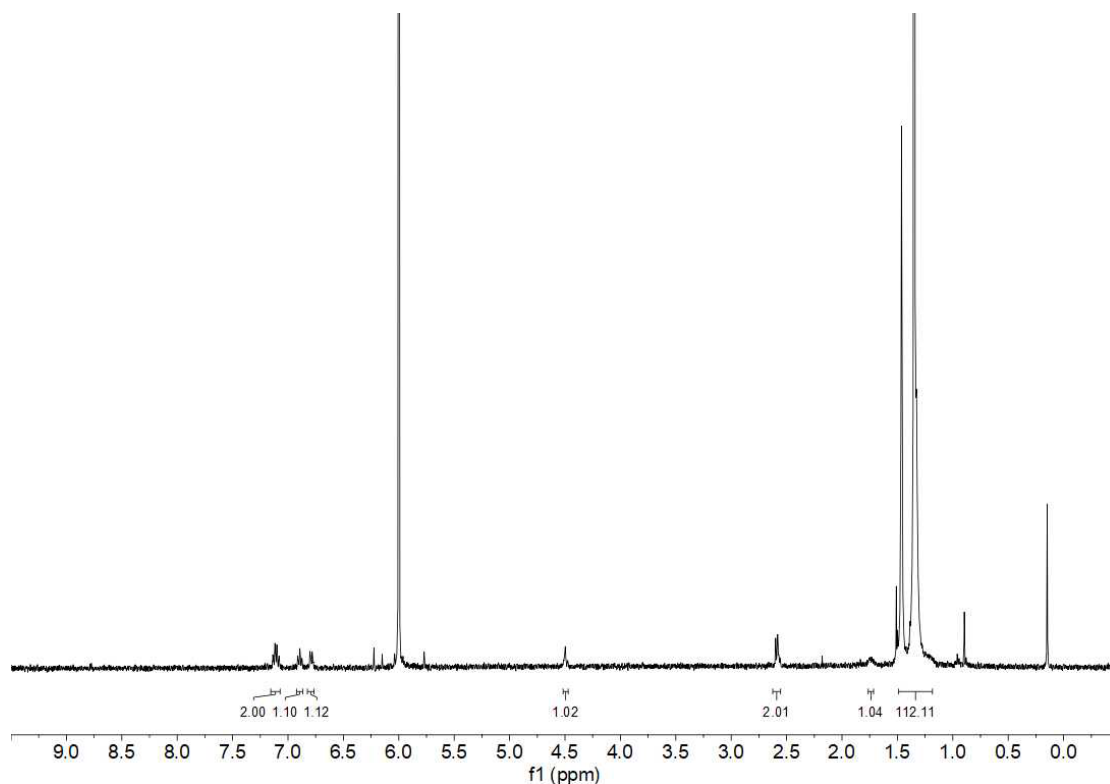

**Figure S11.**  $^1\text{H}$  NMR spectrum (1,1,2,2-tetrachloroethane- $d_2$  at 110  $^\circ\text{C}$ ) for poly(ethylene-*co*-AP) prepared by 3-MAO catalyst system at 50  $^\circ\text{C}$ , AP 0.76 M, ethylene 4 atm (Table 2, run 27, AP 3.8 mol%).

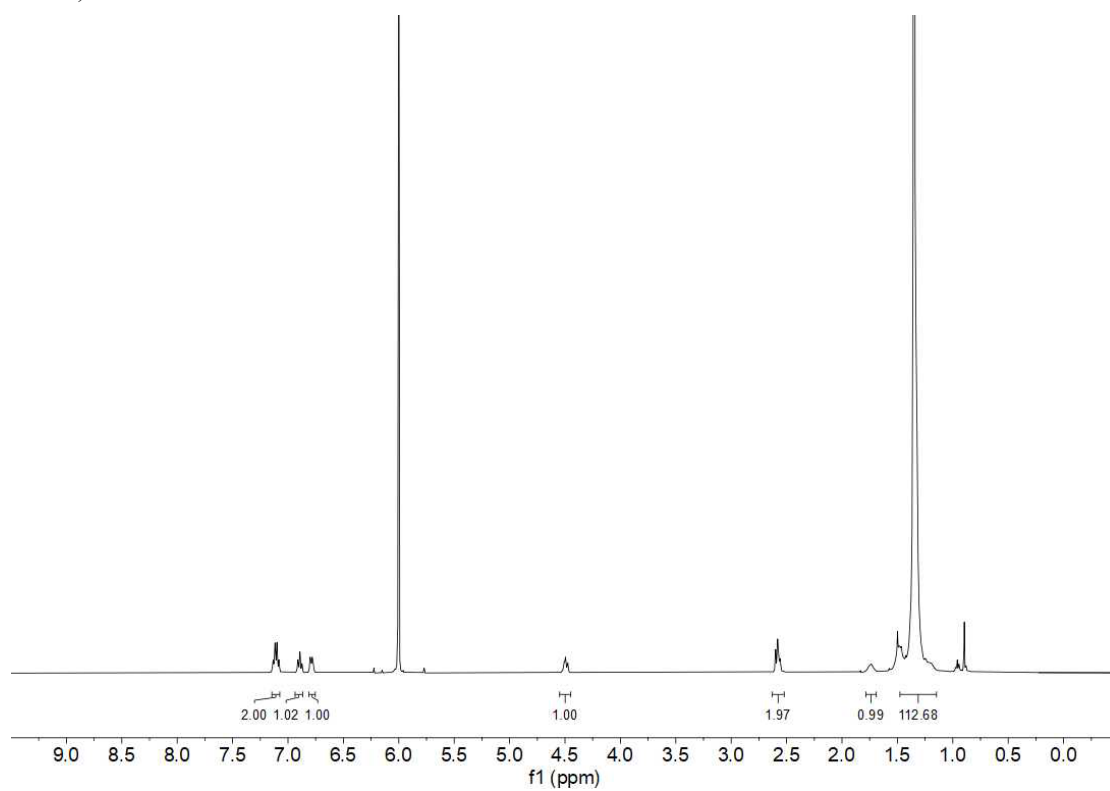

**Figure S12.**  $^1\text{H}$  NMR spectrum (1,1,2,2-tetrachloroethane- $d_2$  at 110  $^\circ\text{C}$ ) for poly(ethylene-*co*-AP) prepared by 4-MAO catalyst system at 50  $^\circ\text{C}$ , AP 0.25 M, ethylene 2 atm (Table 2, run 29, AP 3.6 mol%).

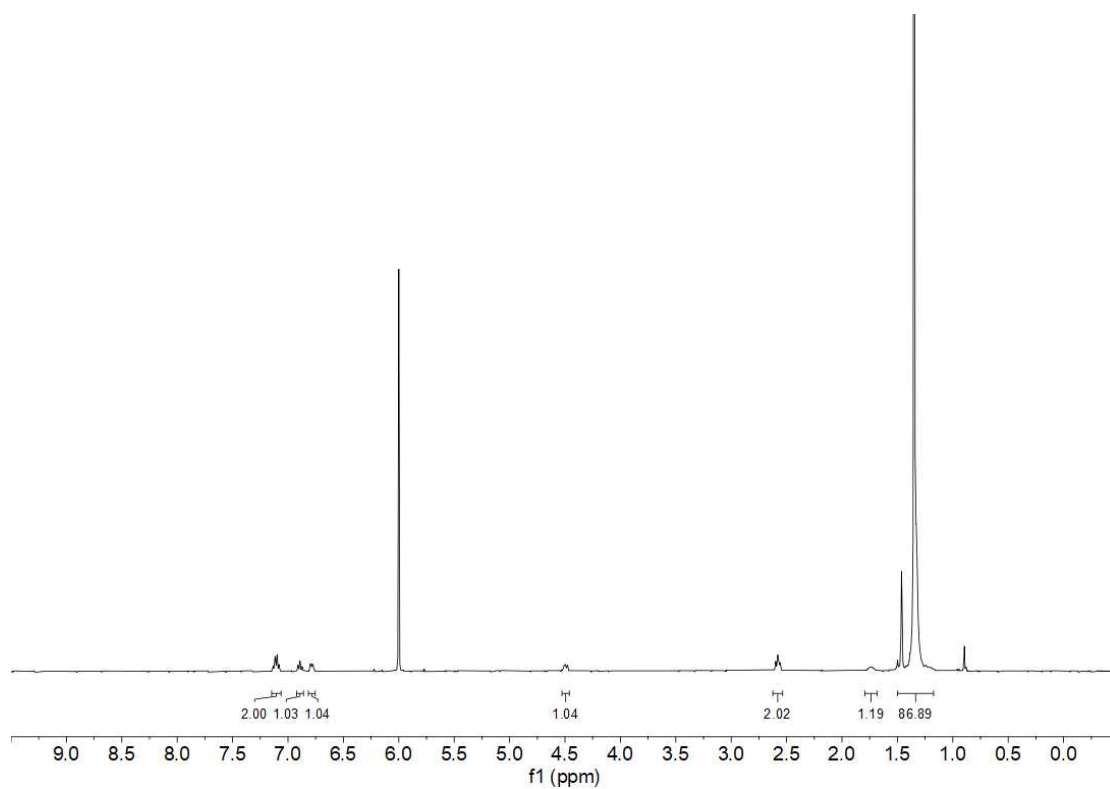

**Figure S13.** <sup>1</sup>H NMR spectrum (1,1,2,2-tetrachloroethane-*d*<sub>2</sub> at 110 °C) for poly(ethylene-*co*-AP) prepared by 1-MAO catalyst system at 50 °C, AP 0.25M, ethylene 2 atm (Table 3, run 31, AP 4.7 mol%).

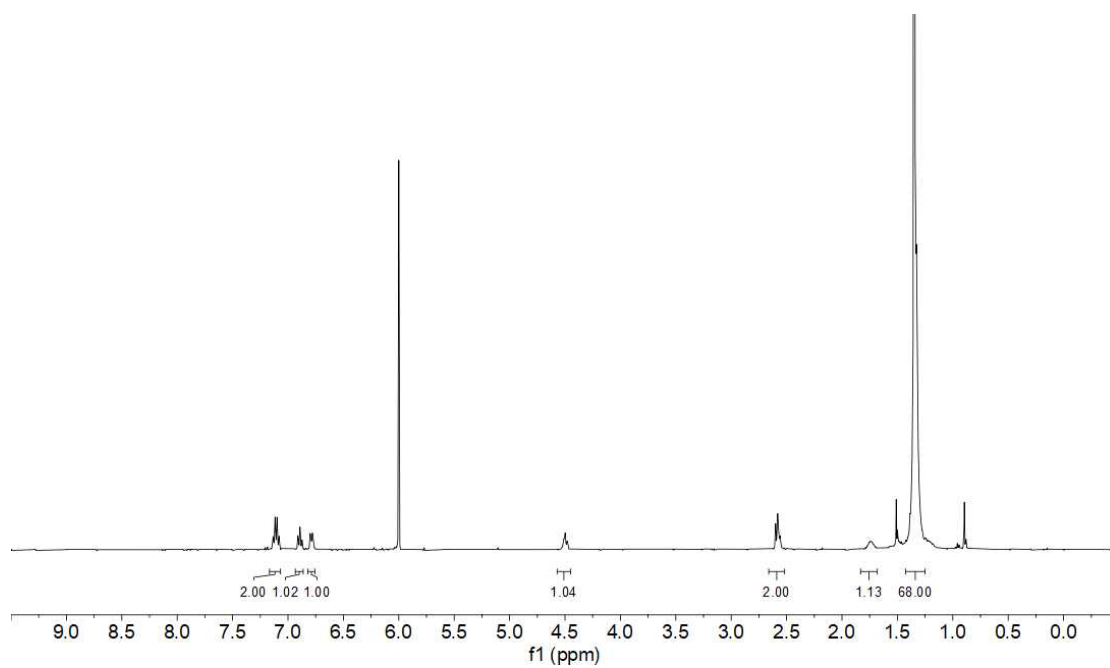

**Figure S14.** <sup>1</sup>H NMR spectrum (1,1,2,2-tetrachloroethane-*d*<sub>2</sub> at 110 °C) for poly(ethylene-*co*-AP) prepared by 1-MAO catalyst system at 50 °C, AP 0.51M, ethylene 2 atm. (Table 3, run 32, AP 6.0 mol%).

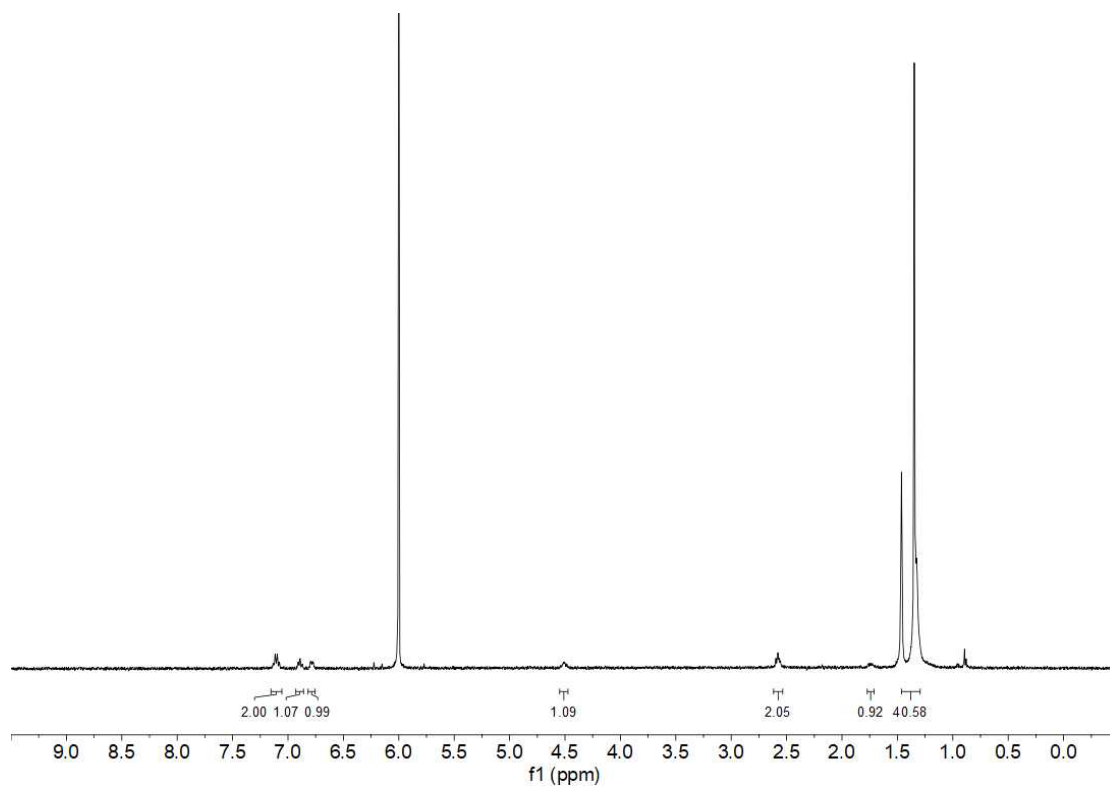

**Figure S15.**  $^1\text{H}$  NMR spectrum (1,1,2,2-tetrachloroethane- $d_2$  at 110 °C) for poly(ethylene-*co*-AP) prepared by 1-MAO catalyst system at 50 °C, AP 0.76 M, ethylene 2 atm (Table 3, run 34, AP 10.3 mol%).

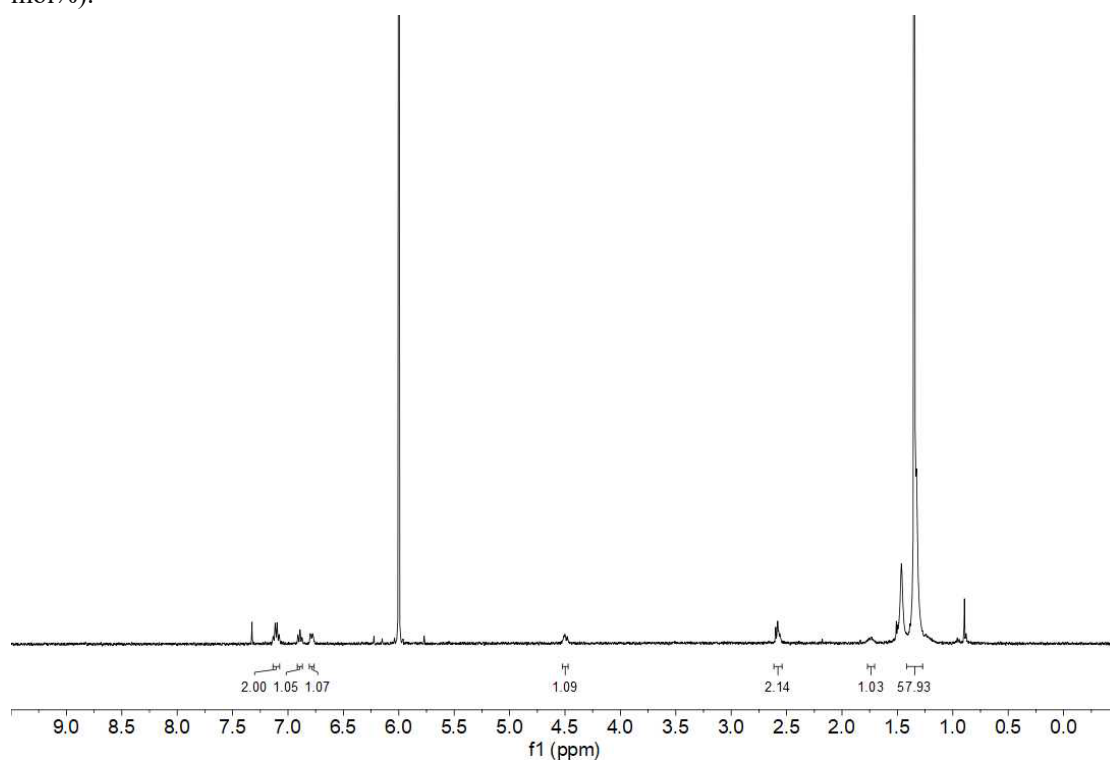

**Figure S16.**  $^1\text{H}$  NMR spectrum (1,1,2,2-tetrachloroethane- $d_2$  at 110 °C) for poly(ethylene-*co*-AP) prepared by 2-MAO catalyst system at 50 °C, AP 0.51 M, ethylene 2 atm (Table 3, run 36, AP 7.2 mol%).

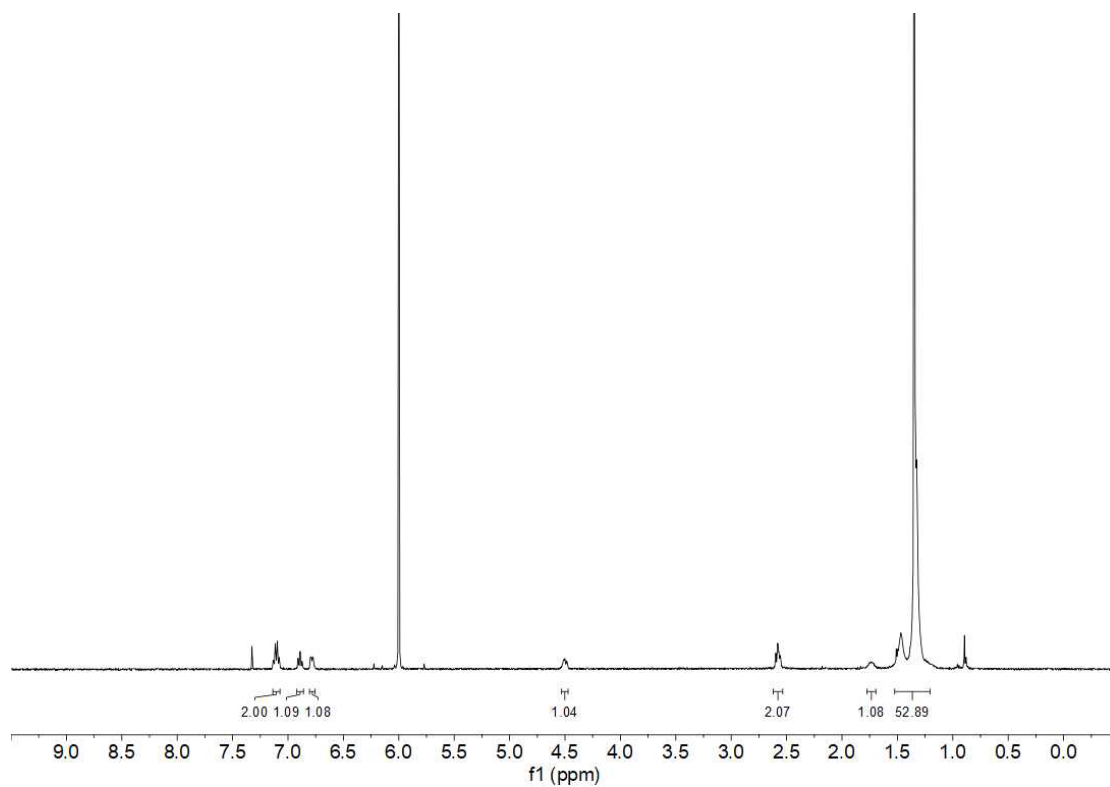

**Figure S17.** <sup>1</sup>H NMR spectrum (1,1,2,2-tetrachloroethane-*d*<sub>2</sub> at 110 °C) for poly(ethylene-*co*-AP) prepared by 2-MAO catalyst system at 50 °C, AP 0.51 M, ethylene 2 atm (Table 3, run 37, AP 8.0 mol%).

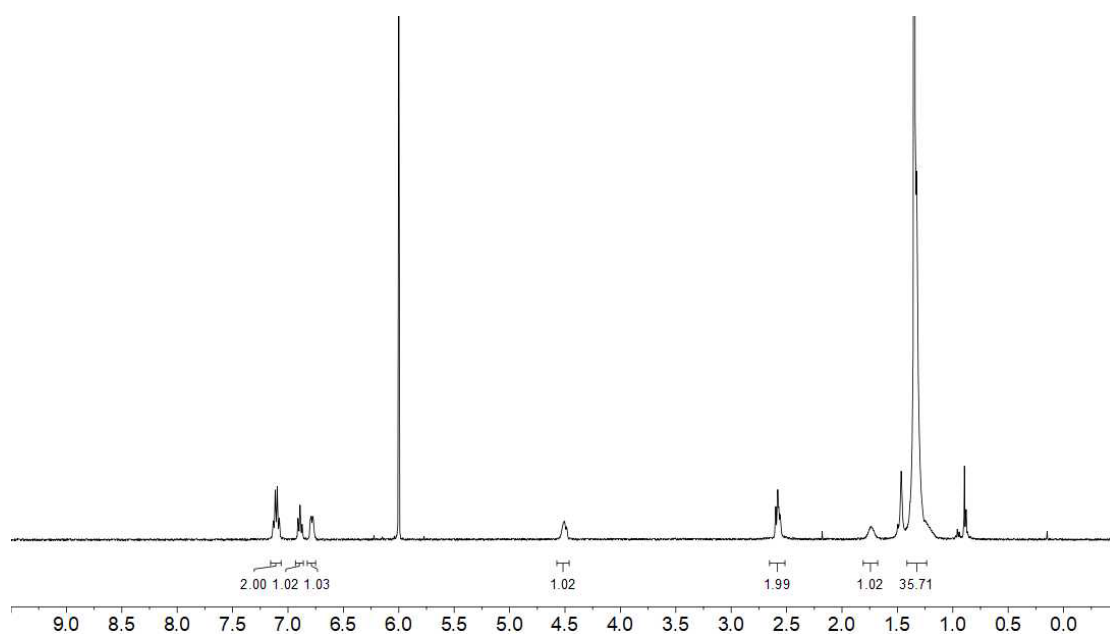

**Figure S18.** <sup>1</sup>H NMR spectrum (1,1,2,2-tetrachloroethane-*d*<sub>2</sub> at 110 °C) for poly(ethylene-*co*-AP) prepared by 2-MAO catalyst system at 50 °C, AP 0.76 M, ethylene 2 atm (Table 3, run 38, AP 11.7 mol%).

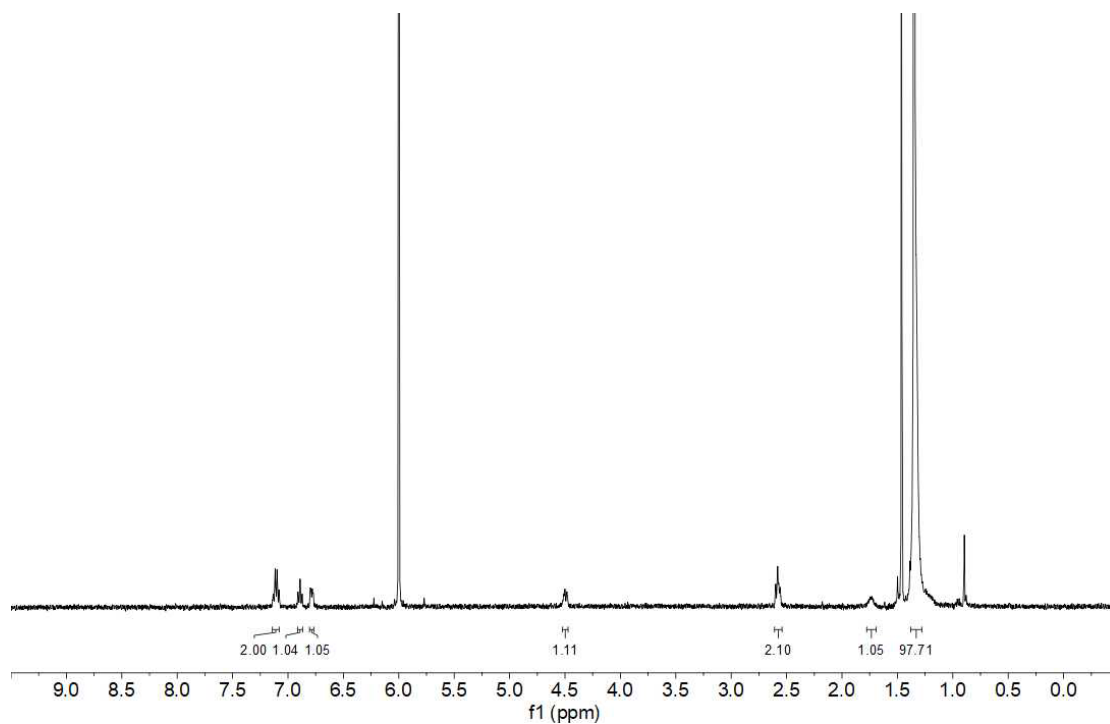

**Figure S19.** <sup>1</sup>H NMR spectrum (1,1,2,2-tetrachloroethane-*d*<sub>2</sub> at 110 °C) for poly(ethylene-*co*-AP) prepared by 3-MAO catalyst system at 50 °C, AP 0.25 M, ethylene 2 atm (Table 3, run 39, AP 4.2 mol%).

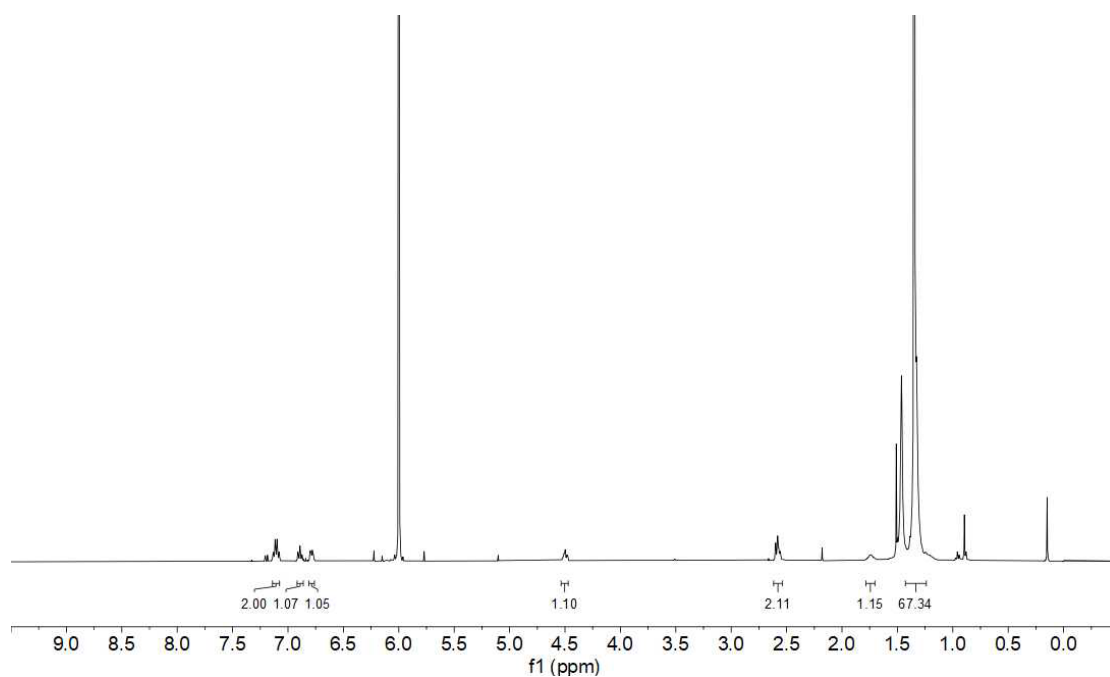

**Figure S20.** <sup>1</sup>H NMR spectrum (1,1,2,2-tetrachloroethane-*d*<sub>2</sub> at 110 °C) for poly(ethylene-*co*-AP) prepared by 3-MAO catalyst system at 50 °C, AP 0.51 M, ethylene 2 atm (Table 3, run 40, AP 6.0 mol%).

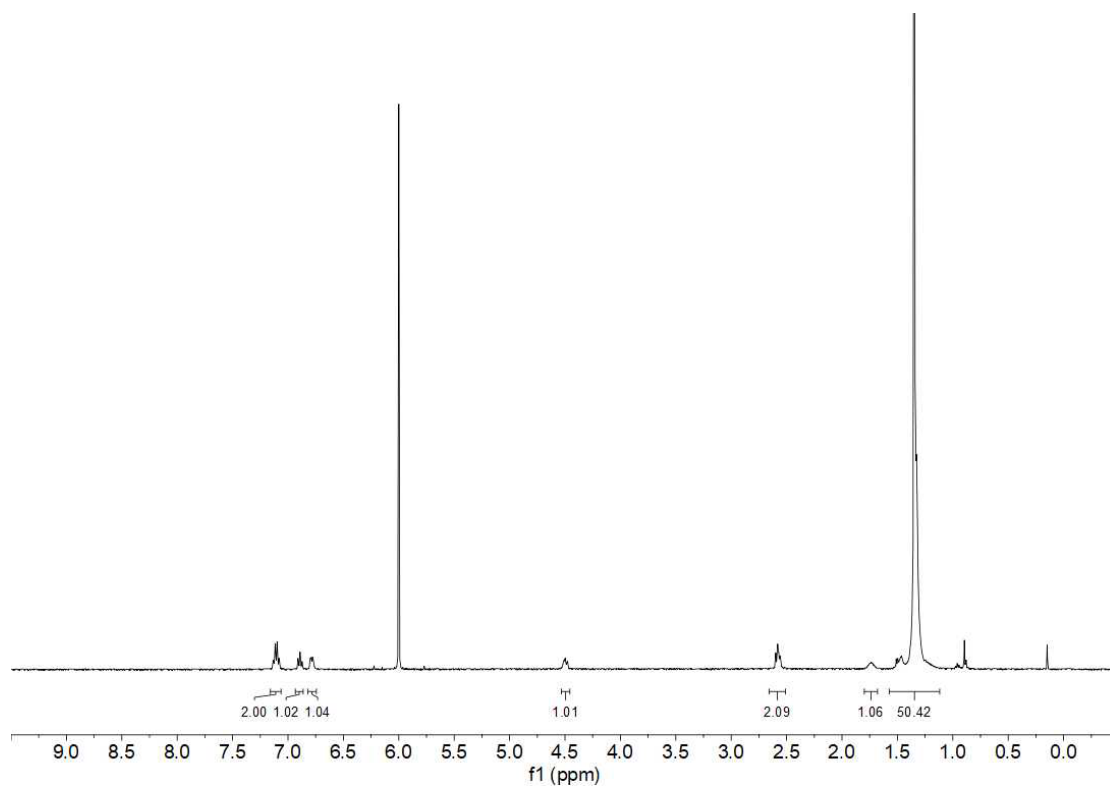

**Figure S21.** <sup>1</sup>H NMR spectrum (1,1,2,2-tetrachloroethane-*d*<sub>2</sub> at 110 °C) for poly(ethylene-*co*-AP) prepared by 3-MAO catalyst system at 50 °C, AP 0.51 M, ethylene 2 atm (Table 3, run 41, AP 8.2 mol%).

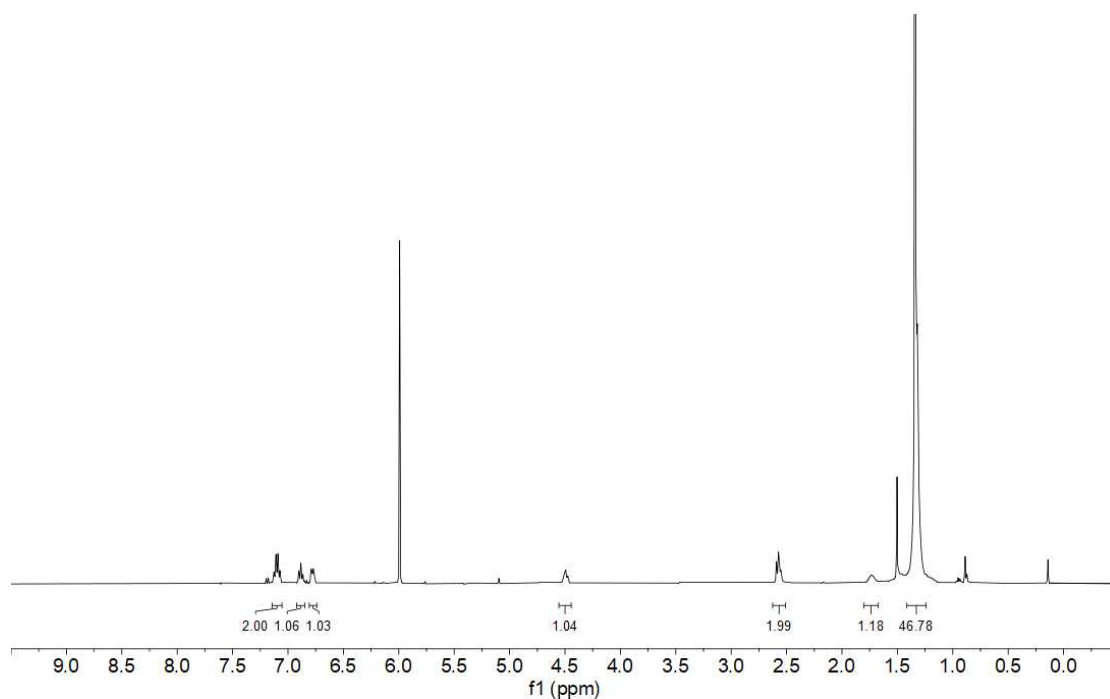

**Figure S22.** <sup>1</sup>H NMR spectrum (1,1,2,2-tetrachloroethane-*d*<sub>2</sub> at 110 °C) for poly(ethylene-*co*-AP) prepared by 3-MAO catalyst system at 50 °C, AP 0.76 M, ethylene 2 atm (Table 3, run 42, AP 9.0 mol%).

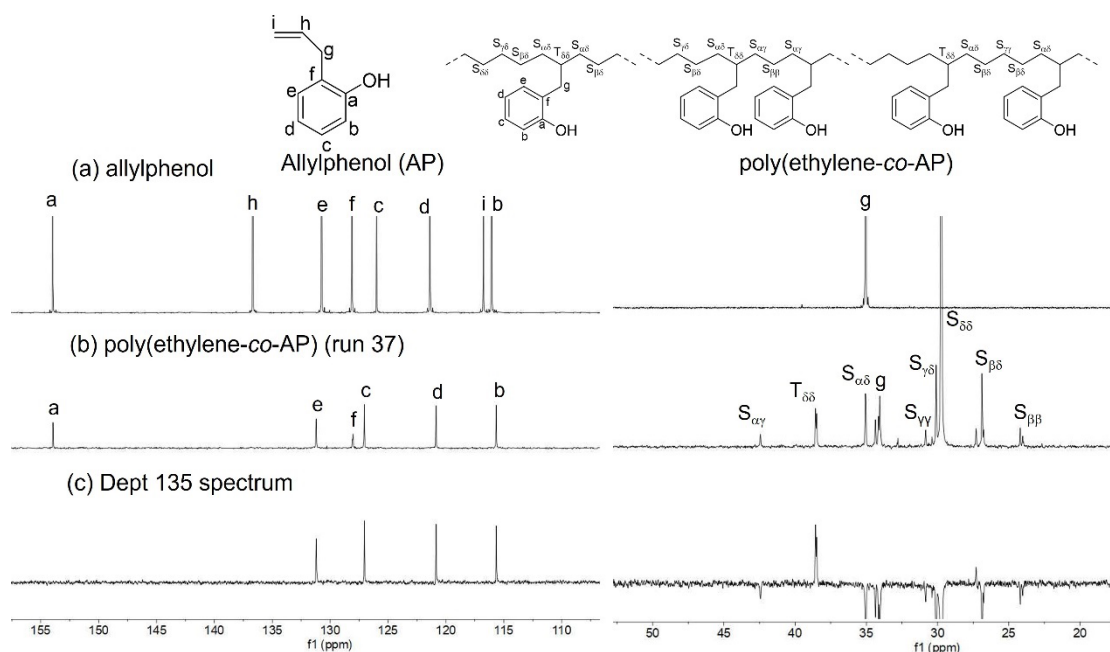

**Figure S23.** (a,b)  $^{13}\text{C}$  NMR spectra and (c) dept spectrum (in 1,1,2,2-tetrachloroethane- $d_2$  at 110  $^{\circ}\text{C}$ ) for (a) allylphenol (AP) and (b,c) poly(ethylene-co-AP) (Table 3, run 37, AP 8.0 mol%).

(a)  $^{13}\text{C}$  NMR spectrum of the sample run 35 (by cat.2)

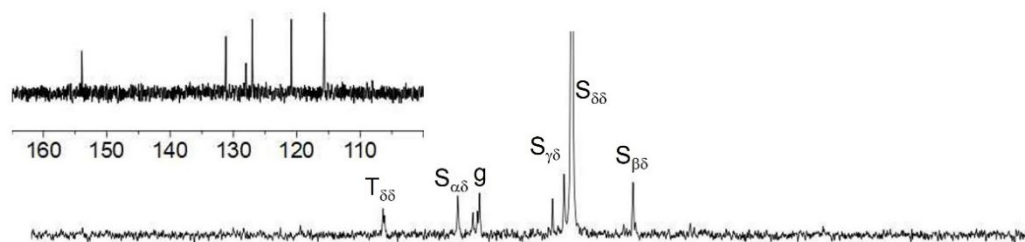

(b) Dept 135 spectrum

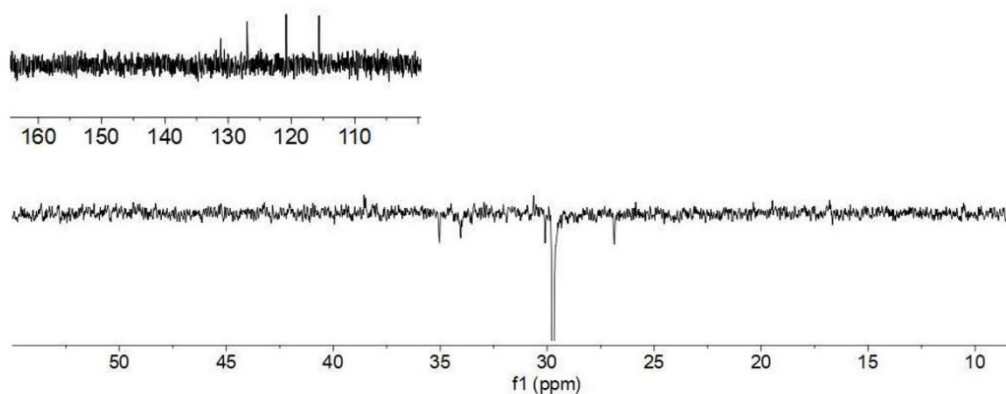

**Figure S24.** (a)  $^{13}\text{C}$  NMR and (b) dept spectrum (in 1,1,2,2-tetrachloroethane- $d_2$  at 110  $^{\circ}\text{C}$ ) for poly(ethylene-co-AP) (Table 3, run 35, AP 4.1 mol%).

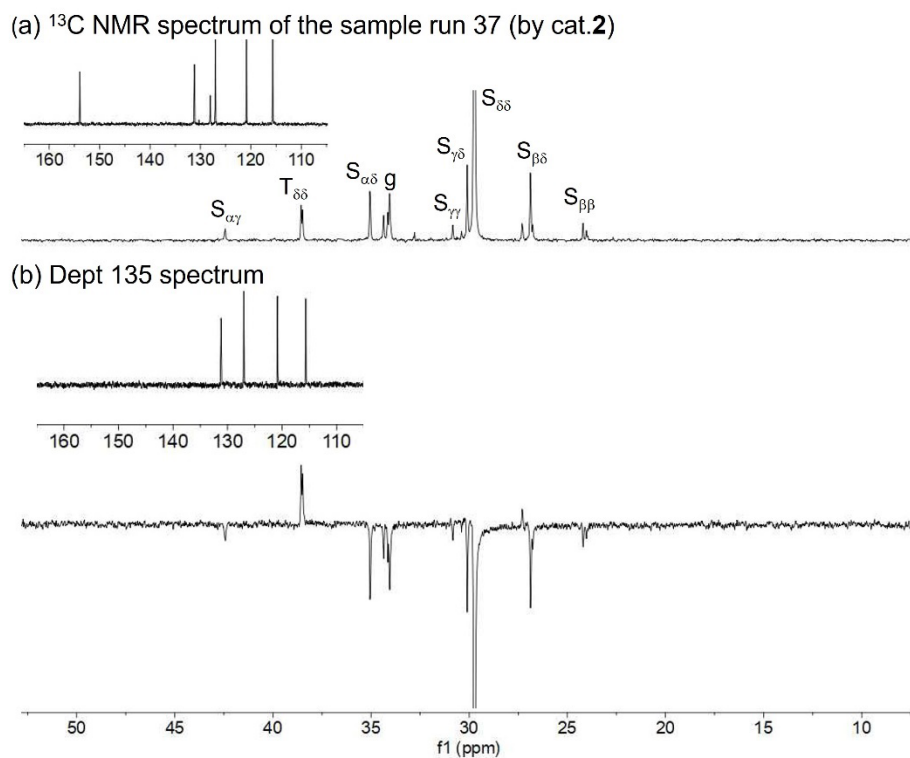

**Figure S25.** (a)  $^{13}\text{C}$  NMR and (b) dept spectrum (in 1,1,2,2-tetrachloroethane- $d_2$  at 110  $^{\circ}\text{C}$ ) for poly(ethylene-*co*-AP) (Table 3, run 37, AP 8.0 mol%).

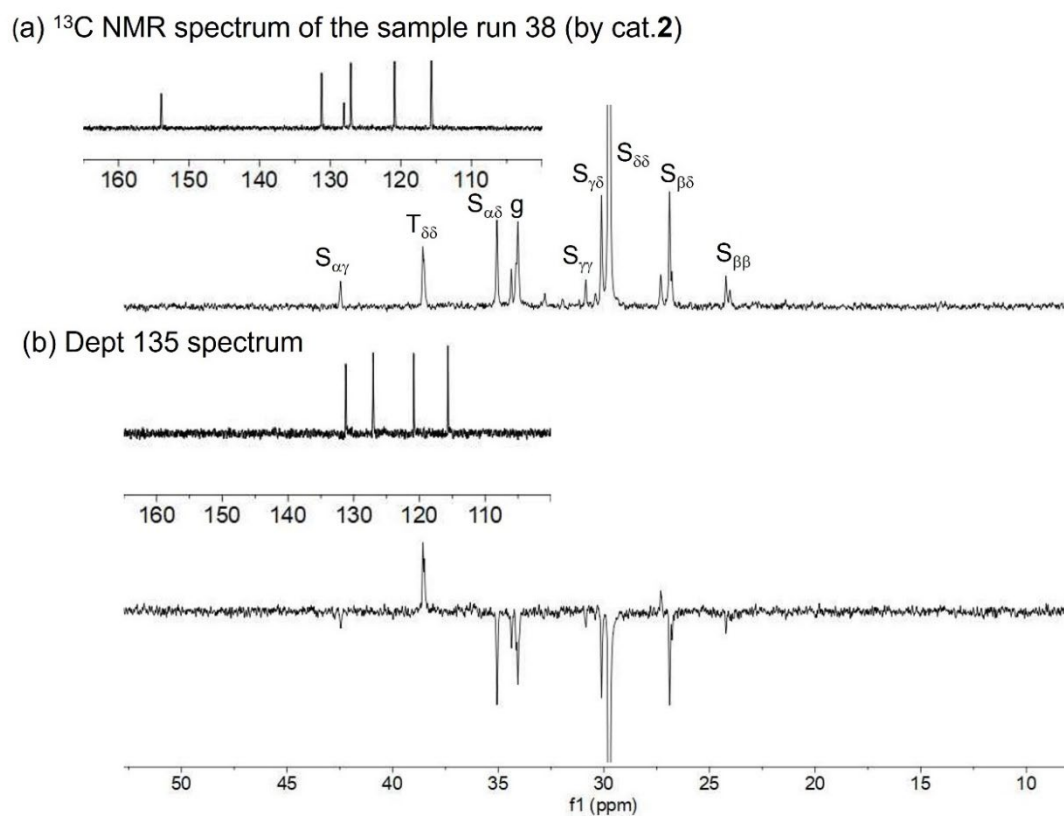

**Figure S26.** (a)  $^{13}\text{C}$  NMR and (b) dept spectrum (in 1,1,2,2-tetrachloroethane- $d_2$  at 110  $^{\circ}\text{C}$ ) for poly(ethylene-*co*-AP) (Table 3, run 38, AP 11.7 mol%).



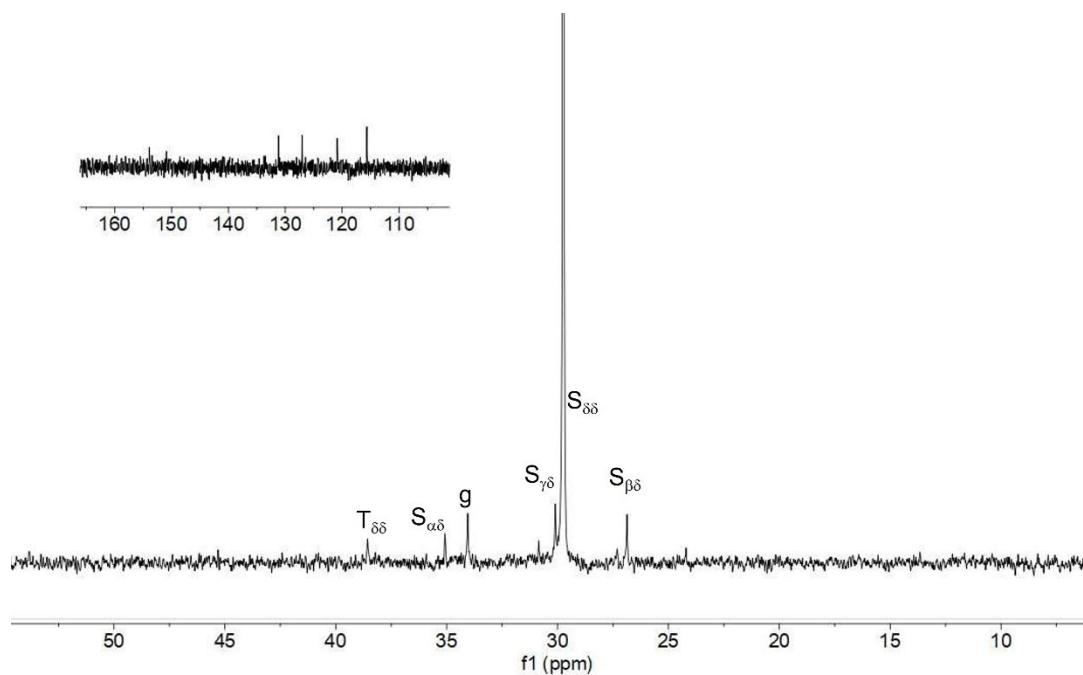

**Figure S27.**  $^{13}\text{C}$  NMR spectrum (in 1,1,2,2-tetrachloroethane- $d_2$  at 110  $^\circ\text{C}$ ) for poly(ethylene-*co*-AP) (Table 2, run 24, AP 3.0 mol%).

(a)  $^{13}\text{C}$  NMR spectrum of the sample run 31 (by cat.1)

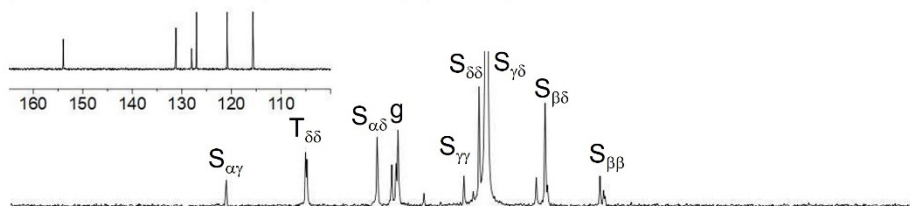

(b) Dept 135 spectrum

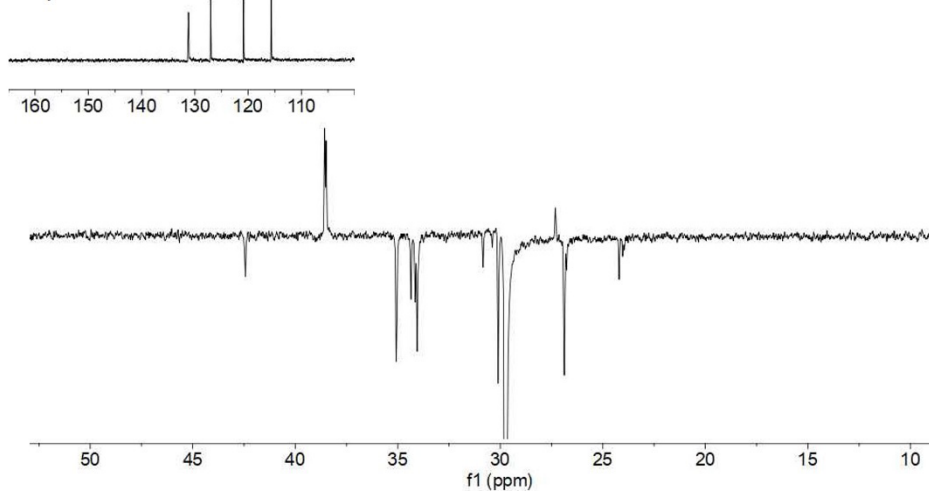

**Figure S28.** (a)  $^{13}\text{C}$  NMR and (b) dept spectrum (in 1,1,2,2-tetrachloroethane- $d_2$  at 110  $^\circ\text{C}$ ) for poly(ethylene-*co*-AP) (Table 3, run 31, AP 4.7 mol%).

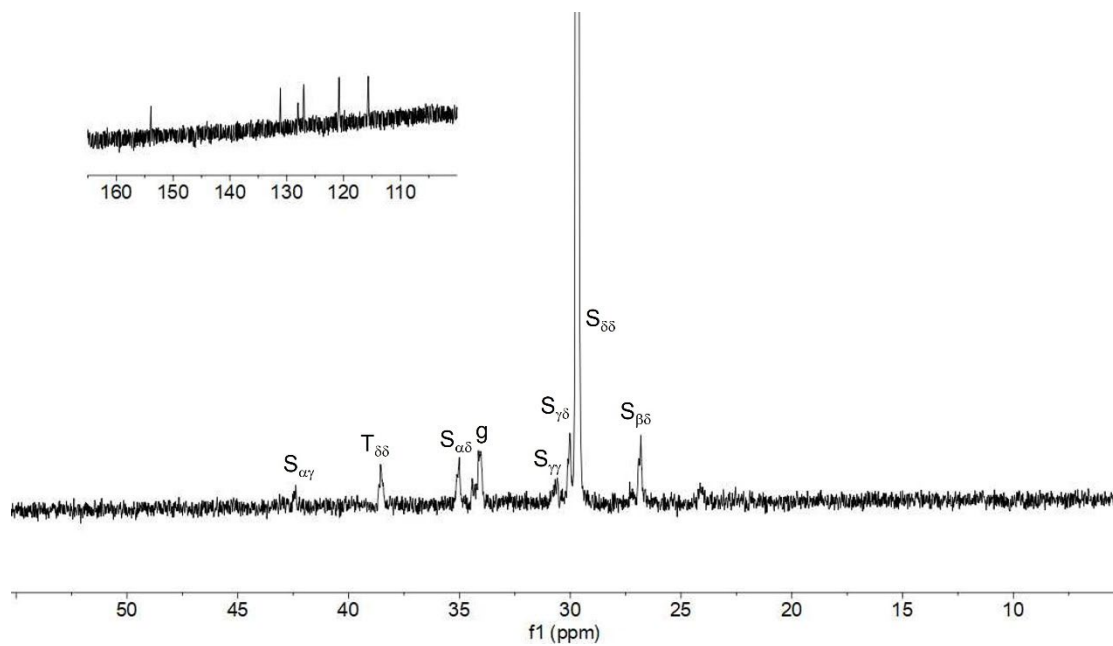

**Figure S29.**  $^{13}\text{C}$  NMR spectrum (in 1,1,2,2-tetrachloroethane- $d_2$  at 110 °C) for poly(ethylene-*co*-AP) (Table 3, run 32, AP 6.0 mol%).

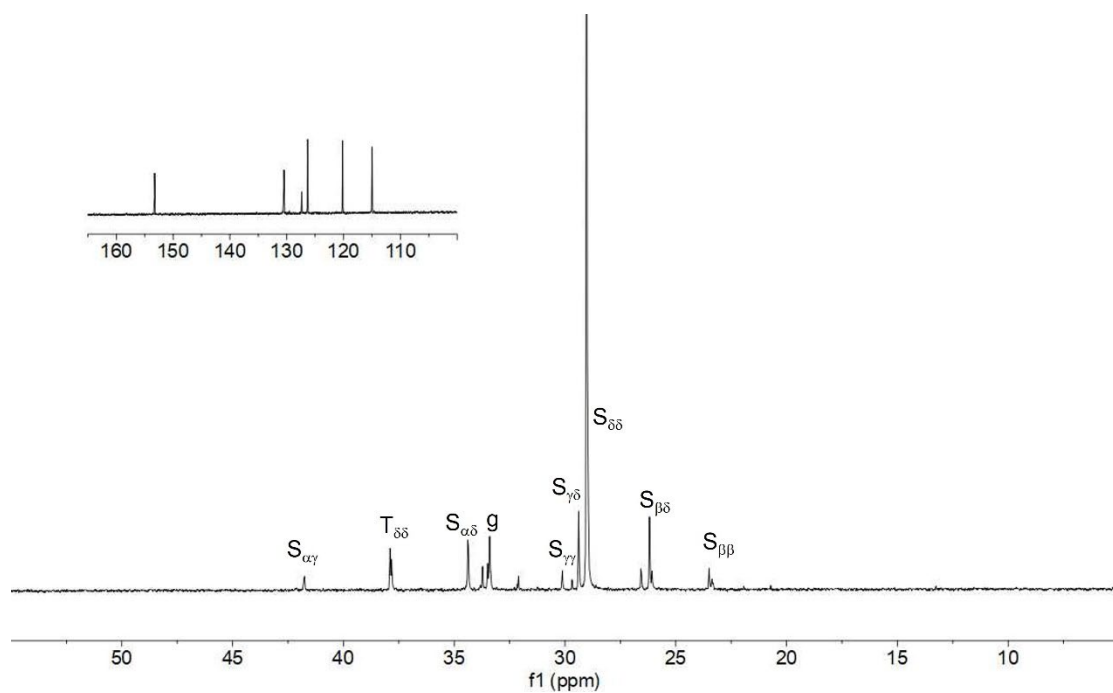

**Figure S30.**  $^{13}\text{C}$  NMR spectrum (in 1,1,2,2-tetrachloroethane- $d_2$  at 110 °C) for poly(ethylene-*co*-AP) (Table 3, run 34, AP 10.3 mol%).

(a)  $^{13}\text{C}$  NMR spectrum of the sample run 21 (by cat.1)

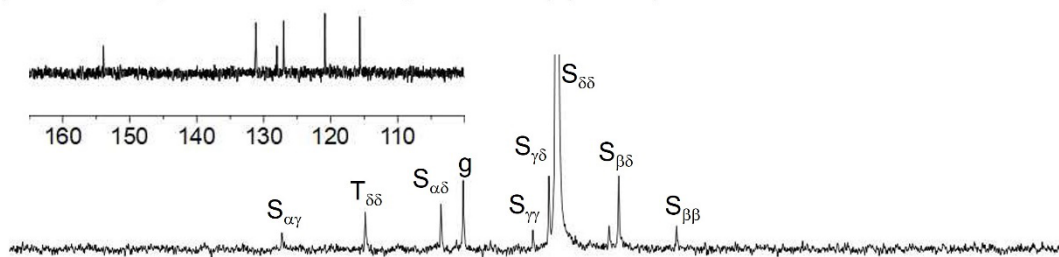

(b) Dept 135 spectrum

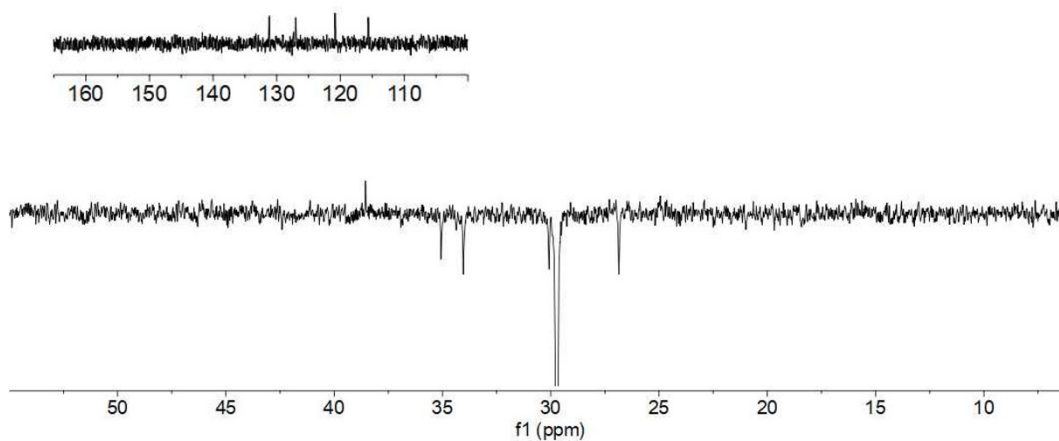

**Figure S31.** (a)  $^{13}\text{C}$  NMR and (b) dept spectrum (in 1,1,2,2-tetrachloroethane- $d_2$  at 110 °C) for poly(ethylene-*co*-AP) (Table 2, run 21, AP 3.0 mol%).

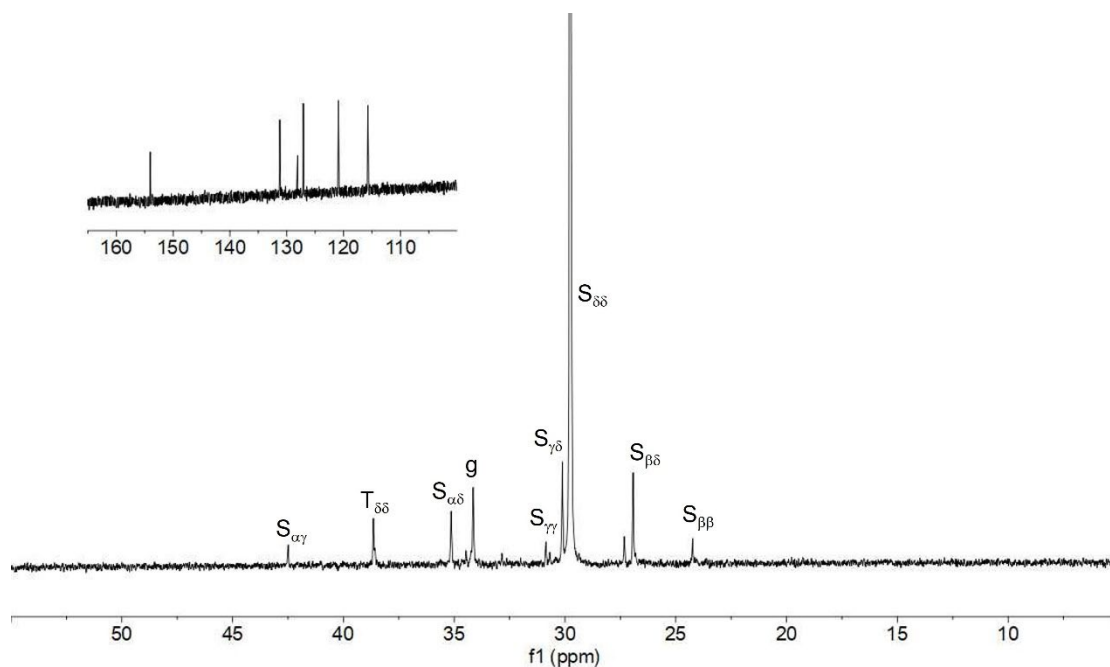

**Figure S32.**  $^{13}\text{C}$  NMR spectrum (in 1,1,2,2-tetrachloroethane- $d_2$  at 110 °C) for poly(ethylene-*co*-AP) (Table 2, run 27, AP 3.8 mol%).

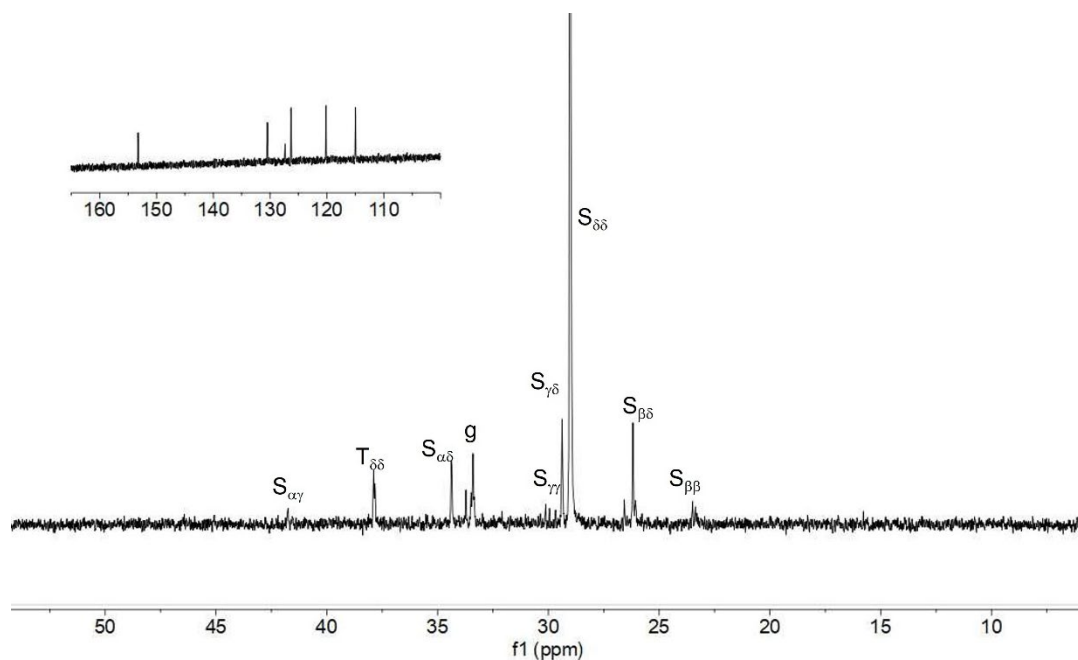

**Figure S33.**  $^{13}\text{C}$  NMR spectrum (in 1,1,2,2-tetrachloroethane- $d_2$  at 110 °C) for poly(ethylene-*co*-AP) (Table 3, run 41, AP 8.2 mol%).

(a)  $^{13}\text{C}$  NMR spectrum of the sample run 42 (by cat. 3)

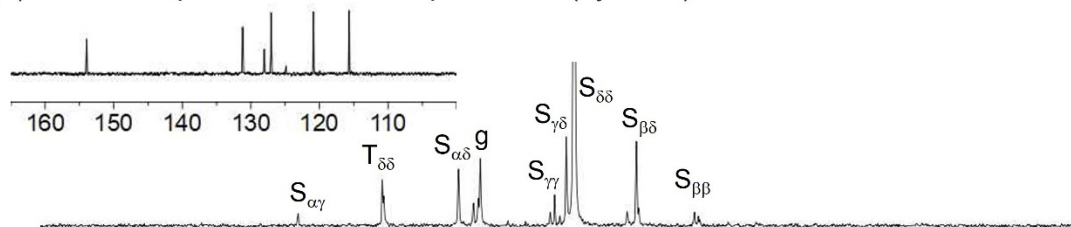

(b) Dept 135 spectrum

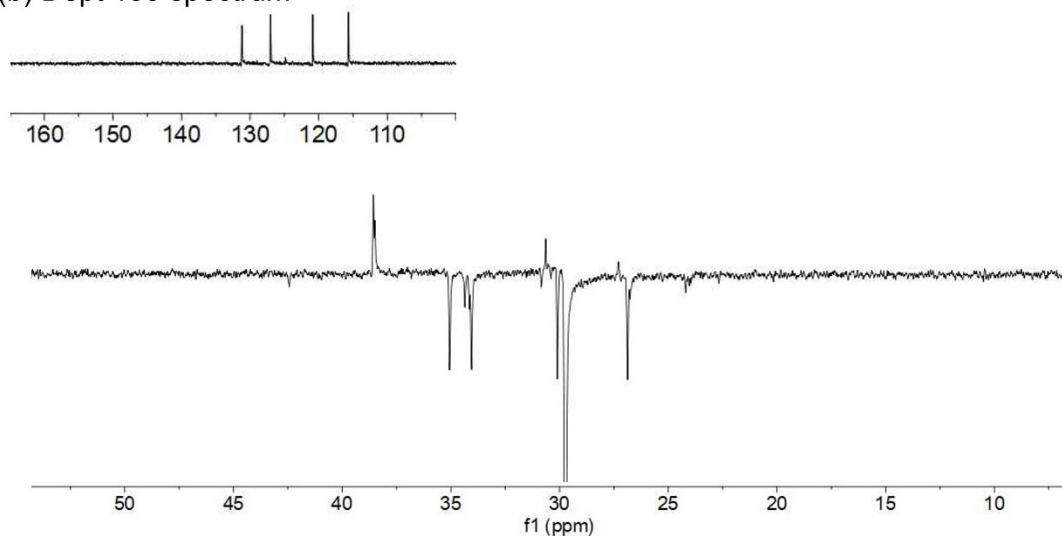

**Figure S34.** (a)  $^{13}\text{C}$  NMR and (b) dept spectrum (in 1,1,2,2-tetrachloroethane- $d_2$  at 110 °C) for poly(ethylene-*co*-AP) (Table 3, run 42, AP 9.0 mol%).

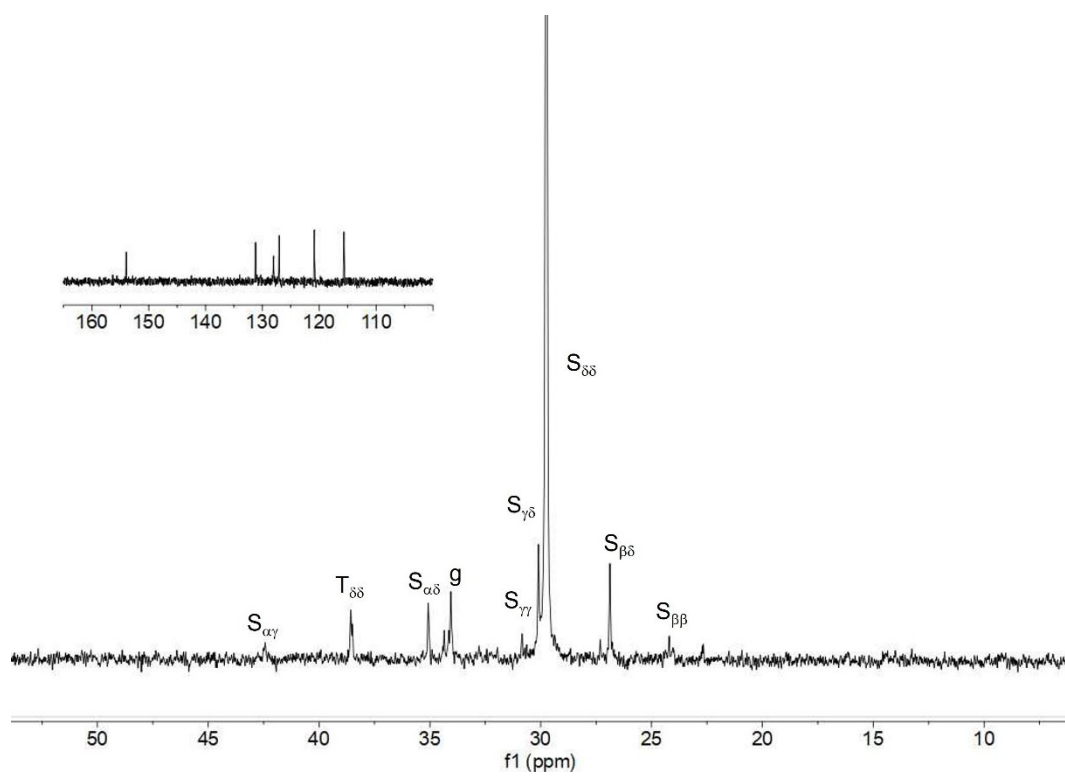

**Figure S35.**  $^{13}\text{C}$  NMR spectrum (in  $1,1,2,2\text{-tetrachloroethane-}d_2$  at  $110\text{ }^\circ\text{C}$ ) for poly(ethylene-co-AP) (Table 2, run 29, AP 3.6 mol%).

### 3. Selected DSC thermograms in the copolymers.

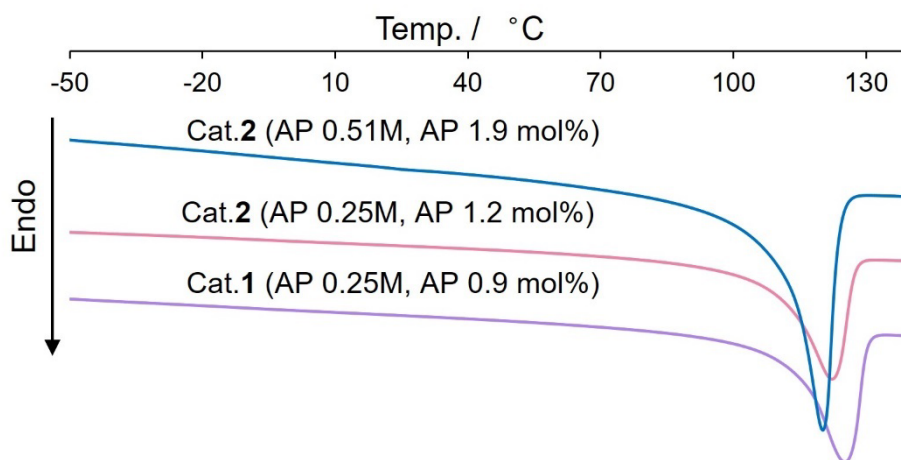

**Figure S36.** DSC thermograms for resultant polymers in ethylene copolymerization of allylphenol (AP) by 1,2-MAO catalyst systems, ethylene 4 atm. The detailed data are shown in Table 1.

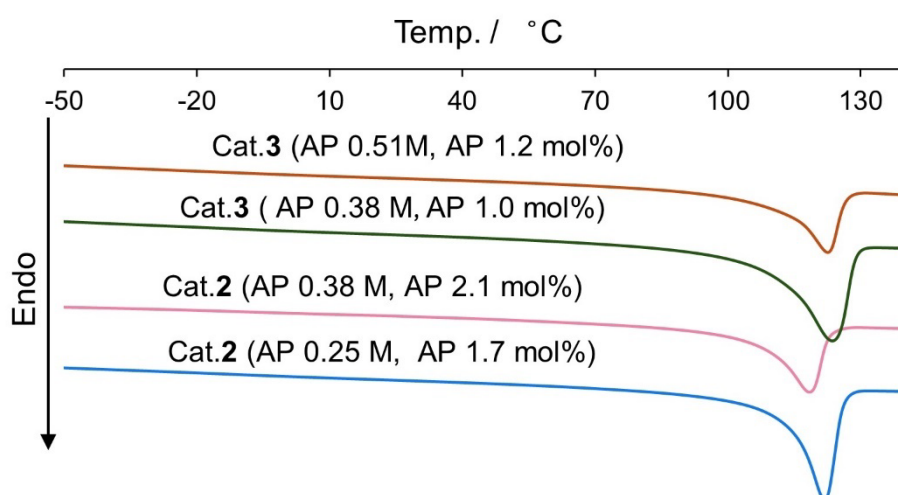

**Figure S37.** DSC thermograms for resultant polymers in ethylene copolymerization of allylphenol (AP) by 2,3-MAO catalyst systems, ethylene 6 atm. The detailed data are shown in Table 1.

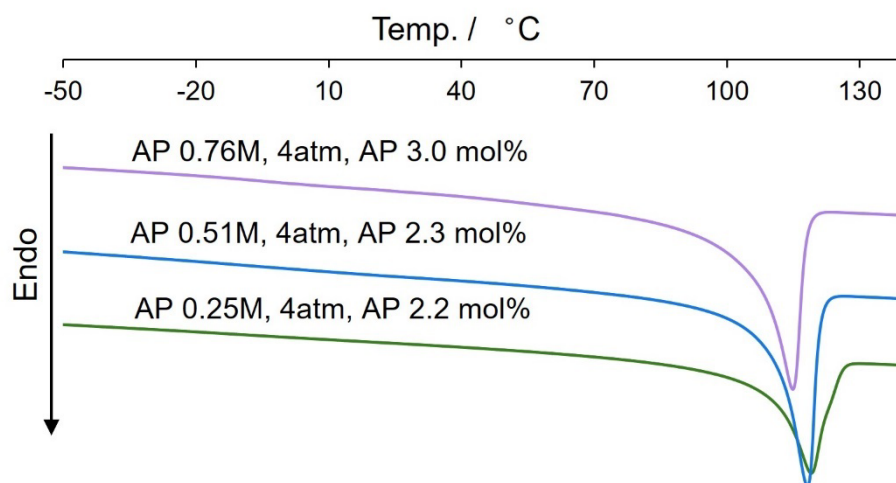

**Figure S38.** DSC thermograms for resultant polymers in ethylene copolymerization of allylphenol (AP) by 1-MAO catalyst system with pretreatment of AP with  $\text{Al}^i\text{Bu}_3$  and 2,6- $t\text{Bu}_2\text{C}_6\text{H}_4\text{OH}$ , ethylene 4 atm. The detailed data are shown in Table 2 (runs 19-21).

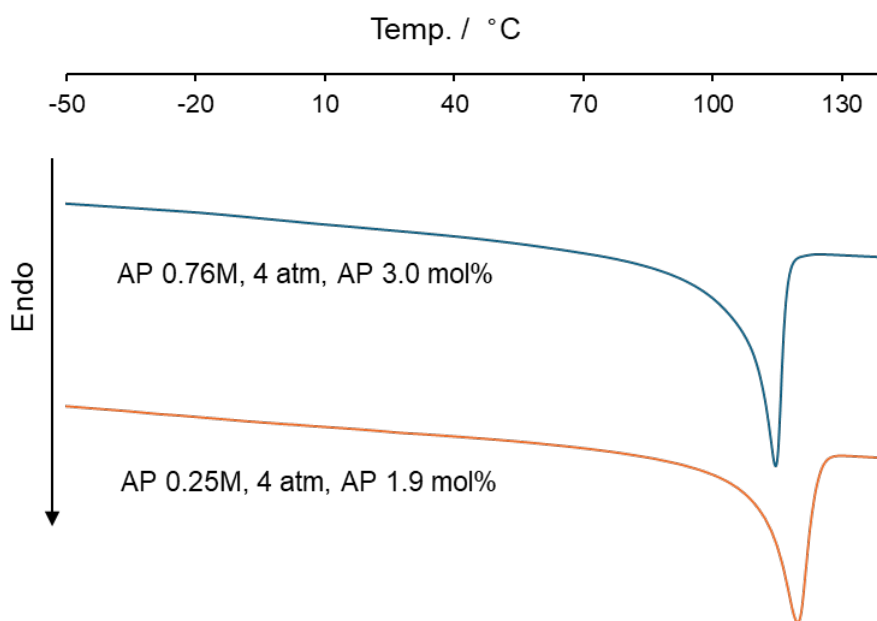

**Figure S39.** DSC thermograms for resultant polymers in ethylene copolymerization of allylphenol (AP) by 2-MAO catalyst system with pretreatment of AP with  $\text{Al}^i\text{Bu}_3$  and 2,6- $t\text{Bu}_2\text{C}_6\text{H}_4\text{OH}$ , ethylene 4 atm. The detailed data are shown in Table 2 (runs 22-24).

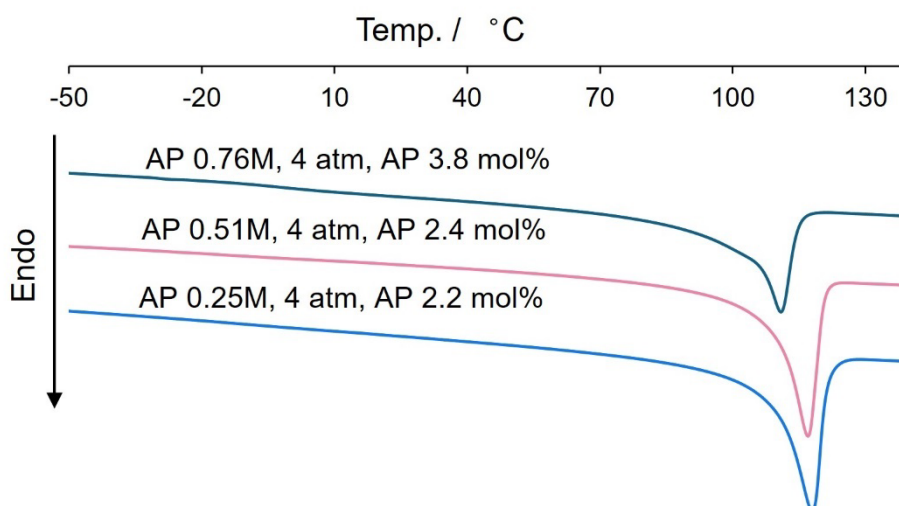

**Figure S40.** DSC thermograms for resultant polymers in ethylene copolymerization of allylphenol (AP) by 3-MAO catalyst system with pretreatment of AP with  $\text{Al}^t\text{Bu}_3$  and 2,6- $t\text{Bu}_2\text{C}_6\text{H}_4\text{OH}$ , ethylene 4 atm. The detailed data are shown in Table 2 (runs 25-27).

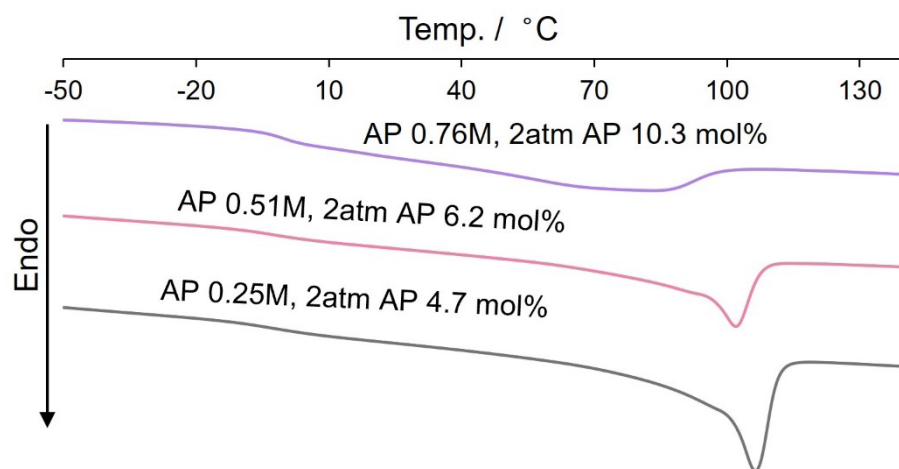

**Figure S41.** DSC thermograms for resultant polymers in ethylene copolymerization of allylphenol (AP) by 1-MAO catalyst system with pretreatment of AP with  $\text{Al}^t\text{Bu}_3$  and 2,6- $t\text{Bu}_2\text{C}_6\text{H}_4\text{OH}$ , ethylene 2 atm. The detailed data are shown in Table 3 (runs 31,33,34).



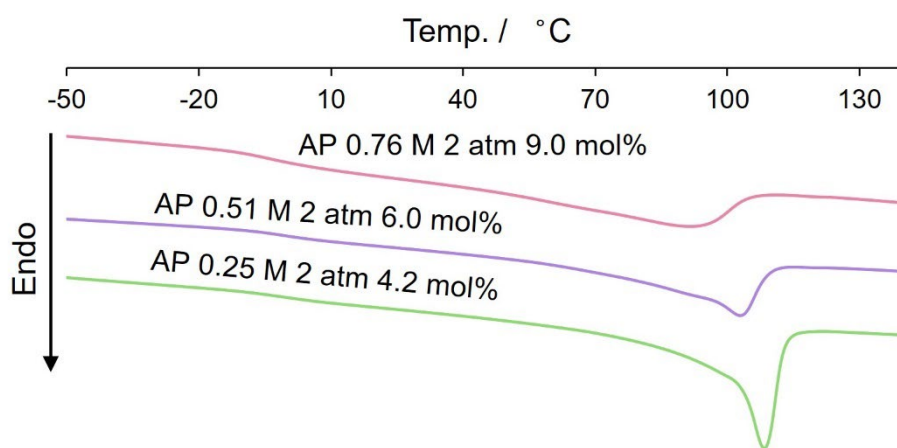

**Figure S42.** DSC thermograms for resultant polymers in ethylene copolymerization of allylphenol (AP) by 3-MAO catalyst system. The detailed data are shown in Table 3 (runs 39,40,42).
